# Supplementary material for: Clinical decision making in spinal fusion for chronic low back pain. Results of a nationwide survey among spine surgeons
Source: PubMed Central journal article supplement — BMJ Open. 2011 Dec 21;1(2):e000391. doi: 10.1136/bmjopen-2011-000391 (PMC3278483; doi:10.1136/bmjopen-2011-000391), 2011-12-21
Supplement: bmjopen-2011-000391.draft_revisions.pdf [file bmjopen-2011-000391.draft_revisions.pdf]

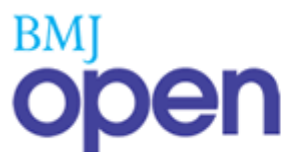

**Spinal fusion for chronic low back pain: No consensus in clinical decision making**

**Results of a nationwide survey among spine surgeons**

|                                 |                                                                                                                                                                               |
|---------------------------------|-------------------------------------------------------------------------------------------------------------------------------------------------------------------------------|
| Journal:                        | <i>BMJ Open</i>                                                                                                                                                               |
| Manuscript ID:                  | bmjopen-2011-000391                                                                                                                                                           |
| Article Type:                   | Research                                                                                                                                                                      |
| Date Submitted by the Author:   | 26-Sep-2011                                                                                                                                                                   |
| Complete List of Authors:       | willems, Paul; Maastricht UMC, Orthopedics<br>de Bie, Rob<br>Öner, Cumhur<br>Castelein, René<br>de Kleuver, Marinus                                                           |
| <b>Primary Subject Heading</b>: | Evidence-based practice                                                                                                                                                       |
| Keywords:                       | Back pain < ORTHOPAEDIC & TRAUMA SURGERY, Spine < ORTHOPAEDIC & TRAUMA SURGERY, Quality in health care < HEALTH SERVICES ADMINISTRATION & MANAGEMENT, Adult surgery < SURGERY |
|                                 |                                                                                                                                                                               |

SCHOLARONE™  
Manuscripts

only

1  
2  
3 **Spinal fusion for chronic low back pain: No consensus in clinical decision**  
4 **making**  
5  
6  
7

8  
9 **Results of a nationwide survey among spine surgeons**  
10  
11  
12  
13  
14

15 Paul Willems, MD<sup>1</sup>, Rob de Bie<sup>2</sup>, MD, PhD, Cumhur Öner<sup>3</sup>, MD, PhD, René  
16 Castelein, MD, PhD<sup>3</sup> and Marinus de Kleuver, MD, PhD<sup>4</sup>  
17  
18  
19  
20  
21  
22  
23

24 <sup>1</sup>Department of Orthopaedics, Research School Caphri, Maastricht University  
25 Medical Center, P.O. Box 5800, 6202 AZ Maastricht, The Netherlands;  
26  
27

28 <sup>2</sup>Department of Epidemiology, Research School Caphri, Maastricht University  
29 Medical Center, P.O. Box 5800, 6202 AZ Maastricht, The Netherlands;  
30  
31

32 <sup>3</sup>Department of Orthopaedics, University Medical Center Utrecht, P.O. Box 85500,  
33 3508 GA Utrecht, The Netherlands;  
34

35 <sup>4</sup>Department of Orthopaedics, Sint Maartenskliniek, Nijmegen, P.O. Box 9011, 6500  
36 GM Nijmegen, The Netherlands  
37  
38  
39  
40  
41  
42  
43

44 Correspondence: Paul Willems, MD  
45 Department of Orthopaedics  
46 Research School Caphri  
47 Maastricht University Medical Center  
48 P. Debyelaan 25  
49 P.O. Box 5800  
50 6202 AZ Maastricht  
51 The Netherlands  
52 Fax: 00-31 (0) 43-3874893  
53 Tel: 00-31 (0) 43-3877038  
54  
55 [p.willems@mumc.nl](mailto:p.willems@mumc.nl)  
56  
57  
58  
59  
60

## Article summary

### Article focus

- What is the level of professional consensus among spine surgeons regarding spinal fusion surgery for chronic low back pain?
- How are tests for patient selection appreciated and to what extent are they used in clinical practice?
- Are prognostic patient factors incorporated in the process of surgical decision making for chronic low back pain?

### Key messages

- In clinical practice there is no professional consensus on surgical treatment strategy for chronic low back pain.
- Prognostic patient factors as well as tests for patient selection are not consistently used in clinical decision making for spinal fusion.
- Because of a lack of consensus on spinal fusion strategy for chronic low back pain in clinical practice, no guidelines for proper patient counselling can be installed at present.

### Strengths and limitations

A survey among physicians provides valuable insight in the actual decision making process in clinical practice. Understanding contributory factors in treatment strategy may help in the creation of consensus guidelines.

The introduction of an interviewer bias could be avoided by the use of a neutral intermediary instead of direct questions from peers in spine surgery.

1  
2  
3 This study focussed on surgeon members of the Dutch Spine Society whose practice  
4 may not reflect that of all surgeons performing spinal fusion for chronic low back pain.  
5 Moreover, no information on conservative treatment options was acquired.  
6  
7  
8  
9

10 To define consensus we chose for uniformity of opinion of at least 70%, which we  
11 considered to be sufficient for implementation in guidelines. Such a cut-off level  
12 remains arbitrary.  
13  
14  
15  
16  
17  
18  
19  
20  
21  
22  
23  
24  
25  
26  
27  
28  
29  
30  
31  
32  
33  
34  
35  
36  
37  
38  
39  
40  
41  
42  
43  
44  
45  
46  
47  
48  
49  
50  
51  
52  
53  
54  
55  
56  
57  
58  
59  
60

For peer review only

## Abstract

**Objectives** To assess the use of prognostic patient factors and predictive tests in clinical decision making for spinal fusion in patients with chronic low back pain.

**Design and setting** Nationwide survey among spine surgeons.

**Participants** Surgeon members of the Dutch Spine Society were questioned on their surgical treatment strategy for low back pain.

**Main outcome measures** The surgeons' opinion on the use of prognostic patient factors and predictive tests for patient selection, were addressed on Likert scales and the degree of uniformity was assessed. In addition, the influence of surgeon specific factors on clinical decision making was determined.

**Results** The comments from 62 surgeons (70% response rate) were analysed. Forty-four surgeons (71%) had extensive clinical experience. There was a statistically significant lack of uniformity of opinion in 7 of the 11 items on prognostic factors and 8 of the 11 items on predictive tests, respectively. Imaging was valued much higher than predictive tests, psychological screening, or patient preferences ( $p < 0.01$ ). Apart from the use of discography and long multi-segment fusions, differences in training or clinical experience did not appear to be of significant influence on treatment strategy.

**Conclusion** The present survey consistently showed a lack of consensus among surgeons. Prognostic patient factors were not consistently incorporated and the large variation in decision making prevents the creation of consensus guidelines. Despite high levels of training and continuous medical education, decision making for spinal fusion to treat chronic low back pain does not have a uniform evidence base in clinical practice.

## Introduction

Chronic low back pain has become one of the main causes of disability in the industrialised world with reported life-time prevalences of up to 85%<sup>1</sup>. In the Netherlands, a small Western European country (16.5 million inhabitants) with a relatively high rate of spine surgery<sup>2</sup>, the annual costs of back pain were estimated at 4.4 billion euros, which are mainly employment-related costs (lost productivity due to work absenteeism)<sup>3</sup>.

Spinal fusion of a painful or degenerative segment can be beneficial to some patients, but it remains a controversial treatment<sup>4,5</sup>. In the first Cochrane review in 1999, no evidence on the effectiveness of fusion for lumbar degenerative disc disease or low back pain was found as compared to natural history, placebo or conservative treatment<sup>6</sup>. In the updated Cochrane review in 2005<sup>7</sup>, two randomized controlled trials (RCT) were included. First, a Swedish trial reported a better outcome of patients treated with spinal fusion compared to patients who received standard conservative care<sup>8</sup>, although at longer follow-up this beneficial effect attenuated<sup>9</sup>. Next, a Norwegian RCT that compared fusion surgery to cognitive behavioural based exercise therapy<sup>10</sup> showed similar results for both treatment modalities at 1 year follow-up. Similarly, in the more recent British spine stabilization trial, no clear evidence was found that spinal fusion was more beneficial than an intensive rehabilitation program at 2 years follow-up<sup>11</sup>. Moreover, fusion had a much higher complication rate in this trial and appeared to be less cost-effective than intensive rehabilitation<sup>12,13</sup>.

Proper patient selection may improve the outcome of fusion for which several prognostic factors and predictive tests have been reported<sup>4,14-19</sup>. However, epidemiological research reveals large variation in fusion rates between countries and even between different regions within the same country<sup>20,21</sup>, suggesting a poor level of professional consensus. Understanding contributory factors in treatment strategy of surgeons, may clarify some of these observed variations and help create consensus guidelines for clinical decision making.

Therefore, we conducted a national survey among spine surgeons in the Netherlands with the aim to assess the surgeons' opinion on prognostic patient factors known from the literature, as well as the use of predictive tests for spinal fusion in clinical practice. In addition, the degree of uniformity in decision making was determined.

## Materials and Methods

A 25-question survey (see Appendix) was sent by mail to all surgeon members of the Dutch Spine Society, by Memic, a Center for Data and Information Management, University of Maastricht, the Netherlands ([www.memic.unimaas.nl](http://www.memic.unimaas.nl)). In an accompanying letter the background rationale for the enquiry, as well as the voluntary and confidential nature was stressed and the surgeons were reassured that individual comments would remain anonymous.

The questionnaire concerned the selection for spinal fusion of patients with low back pain caused by degenerative lumbar disc disease without signs of neurological deficit, spinal stenosis, deformity or spondylolisthesis and in the absence of trauma, tumor or infections. This group was further referred to as chronic low back pain patients. For clarity the questionnaire had first been evaluated and revised by a clinical researcher and two orthopaedic surgeons. Most questions could be answered according to a 5-point Likert scale. Surgeon specific factors (e.g., discipline, clinical experience), the influence of patient factors (prognostic factors as reported in literature), and the use of tests for patient selection (e.g., provocative discography), were addressed. The respondents were specifically asked to rely on their own individual opinion and management in practice.

Those who had not responded received a second call by mail after two months, and final inclusion was set another two months later. Data were entered into Excel<sup>TM</sup> (Microsoft, Corp., Redmond, WA) and all inconsistencies were resolved. Unanswered questions were coded as missing. Descriptive statistics was used in which all frequencies were based on the number of valid responders.

For analysis the answers on the 5-point Likert scale were merged into one intermediate option ("neutral") and 2 opposite categories ("always/almost always" versus "never/almost never" and "fully/globally agree" versus "globally/fully disagree"). The data were processed with Statistical Package for the Social Sciences software (SPSS, Inc., Chicago, IL). Pearson's chi-square test was used to evaluate whether surgeon specific factors were associated with clinical decision making. Uniformity of opinion was defined to be present if 70% or more of the respondents answered similarly. In other words, there was no consensus if the proportion of the largest category was statistically significantly lower than 70% (Pearson's chi-square test). Differences in mean values rating the impact of factors on decision making,

1  
2  
3  
4  
5  
6  
7  
8  
9  
10  
11  
12  
13  
14  
15  
16  
17  
18  
19  
20  
21  
22  
23  
24  
25  
26  
27  
28  
29  
30  
31  
32  
33  
34  
35  
36  
37  
38  
39  
40  
41  
42  
43  
44  
45  
46  
47  
48  
49  
50  
51  
52  
53  
54  
55  
56  
57  
58  
59  
60

were tested by Independent t-test for equality of means. The level of significance was set at  $p < 0.05$ .

For peer review only



## Results

Nine of the 150 surveyed surgeons (89 orthopaedic surgeons and 61 neurosurgeons) had ended their professional career and 9 respondents stated not to perform spinal surgery anymore. Of the remaining 132 active spine surgeons, 93 (70%) completed and returned the questionnaire. Thirty-one of the 93 respondents (33%) declared not to perform spinal fusion for low back pain and were excluded from further analysis. The characteristics of the final group of 62 respondents are listed in Table 1. The level of experience for neurosurgeons and orthopaedic surgeons was equal: 11 of 16 (69%) versus 33 of 46 (72%) worked ten years or more in clinical practice, respectively.

### *Prognostic factors*

The respondents' comments on prognostic factors are listed in Table 2. For 7 of the 11 items there was no consensus (significantly less than 70% uniformity of opinion). More than 70% of the respondents would fuse patients over 60 years old for back pain. Years of clinical experience or specialty did not appear to be of influence ( $p=0.504$ , and  $p=0.690$ , respectively).

Only 1 of 15 neurosurgeons fused patients below 20 for back pain, versus 14 of 46 orthopaedic surgeons ( $p=0.063$ ).

Eighteen orthopaedic surgeons performed fusion of 3 or more levels for low back pain, whereas no neurosurgeon did ( $p=0.003$ ).

### *Tests for patient selection*

The surgeons' appreciation and use of predictive tests are listed in Tables 3a and 3b, respectively. Apart from MRI, there was no uniformity regarding the value of these tests for clinical decision making.

Mainly orthopaedic surgeons (21 of 46, versus 2 of 16 neurosurgeons,  $p=0.025$ ) considered provocative discography to be a valid predictor of fusion. Spine surgeons working in general hospitals (20 of 43), appeared to believe more in the test than academic surgeons did (3 of 18,  $p=0.028$ ). There was no relation with clinical experience ( $p=0.406$ ). Apart from the use of discography, differences in discipline or clinical experience did not appear to be of significant influence on treatment strategy.

1  
2  
3 In the evaluation of chronic low back pain no other predictive tests than those  
4 mentioned in Tables 3a and 3b were used on a regular basis.  
5  
6  
7

### 8 *Individual decision making in clinical practice*

9  
10 Figure 1 shows the importance of predictive tests and prognostic factors for clinical  
11 decision making as rated on a scale from 0 to 10. Patient history and imaging were  
12 valued significantly higher than predictive tests, psychological screening or patient  
13 preferences (all respective comparisons:  $p < 0.01$ , Independent t-test).  
14  
15  
16

17 The impact of surgeon specific factors on treatment strategy is listed in figure 2.

18 Experience was rated highest (mean  $\pm$  sd,  $8.0 \pm 1.7$ ), as compared to findings from  
19 literature ( $7.7 \pm 1.1$ ,  $p = 0.26$ ), scientific courses ( $7.3 \pm 1.4$ ,  $p = 0.01$ ), and training ( $6.8 \pm$   
20  $2.8$ ,  $p < 0.01$ ).  
21  
22  
23

24 Twenty-seven (45%) surgeons responded to have a protocol for decision making to  
25 which they frequently or always adhered. Of those 35 respondents who did not have  
26 such a protocol, 23 (68%) replied that there should be guidelines. In other words, 50  
27 respondents (83%) felt that clinical guidelines in the management of CLBP patients  
28 are prerequisite.  
29  
30  
31  
32  
33  
34  
35  
36  
37  
38  
39  
40  
41  
42  
43  
44  
45  
46  
47  
48  
49  
50  
51  
52  
53  
54  
55  
56  
57  
58  
59  
60

## Discussion

This study presents the results of the first nationwide survey among spine surgeons regarding clinical decision making for spinal fusion in patients with chronic low back pain. The response rate was adequate (70%) and the majority of the respondents (71%) had extensive clinical experience in spinal surgery. A considerable heterogeneity in the use and appreciation of predictive tests was observed. Prognostic patient factors were not consistently incorporated in clinical decision making.

### *Strengths and weaknesses*

This survey focused on surgeon members of the Dutch Spine Society whose practice may not reflect that of all surgeons performing spinal fusion for low back pain. This may have produced a selection bias. It is reasonable, however, to expect that surgeons with a special interest in the spine are exactly those to be most aware of guidelines and research findings in the field.

To define consensus we chose for uniformity of opinion of 70% or more of the respondents. We felt that this level of agreement should be sufficient for implementation in guidelines. Such a cut-off level remains, of course, arbitrary and debatable.

The introduction of an interviewer bias could be avoided by employing Memic, Center for Data and Information Management, as a neutral intermediary. In this way, surgeons could feel free to answer what they personally felt or practiced, as opposed to what they thought would be considered “correct”.

For statistical analysis the 5-point Likert scale responses were merged into 3 categories, which may have simplified the respondents’ opinion on the management of low back pain in practice.

### *Comparison with related research*

Older age is an acknowledged predictor of poor outcome<sup>14</sup>. Nevertheless, almost three quarters (73%) of the respondents fused patients above 60 for low back pain. Despite the fact that 2 or 3-level fusions have been reported to have proven higher rates of pseudarthrosis with lower patient satisfaction as compared to single level fusions<sup>5,14</sup>, over 30% of the respondents would consider fusion of 3 levels or more.

1  
2  
3 Although fusion surgery is not recommended unless 2 years of conservative  
4 treatment have failed<sup>22</sup>, 63% of the surgeons felt that less than 1 year of conservative  
5 therapy is enough to consider fusion.  
6  
7

8 Obesity is an independent risk factor for low back pain, and surgery in these patients  
9 is significantly associated with major complications, such as thrombo-embolism and  
10 infection<sup>19</sup>. Nevertheless, 53% of the respondents would operate for chronic low back  
11 pain on obese patients and 24% on the morbid obese. Less than half of the surgeons  
12 (47%) consistently referred overweight patients to a dietician.  
13  
14

15 There was no consensus regarding smoking, which is known to be an independent  
16 risk factor for low back pain<sup>15</sup> and associated with worse results of spinal fusion<sup>12</sup>.  
17 About 41% would fuse heavy smokers, whereas 48% would not operate smokers for  
18 back pain.  
19  
20

21 Psychologically stressful work has been associated with low back pain and  
22 disability<sup>17</sup>, and it has been reported that psychological distress, depressive mood  
23 and somatisation lead to an increased risk of chronicity<sup>18</sup>. In addition, presurgical  
24 depression is associated with worse patient outcome after lumbar fusion<sup>14</sup>. Only 16%  
25 of the respondents referred patients routinely for psychological screening and 39%  
26 never referred for this purpose at all.  
27  
28

29 There is strong evidence that clinical interventions are not effective in returning  
30 patients back to work once they have been off work for a longer time<sup>22</sup>. About half of  
31 the respondents agreed that the work status of patients with low back pain affects  
32 outcome considerably and 69% acknowledged that litigation or workers'  
33 compensation are of great influence on decision making, as they have been  
34 associated with persisting pain and disability<sup>17</sup>.  
35  
36

37 Two-thirds (66%) of the respondents considered findings on plain radiographs and  
38 MRI-scan alone to be insufficient for surgical decision making (Table 3a). This is in  
39 accordance with the literature indicating that degenerative or black discs on MRI do  
40 not appear to have a strong clinical relevance<sup>23,24</sup> and that there is no correlation  
41 between radiographic signs of degeneration and clinical outcome<sup>25</sup>.  
42  
43

44 Opinion differed about trial immobilization with a pantaloons cast: 40% of the  
45 respondents agreed that it is a valuable test and 36% disagreed. This resembles  
46 conflicting reports from the literature claiming that the test is not predictive of fusion  
47 outcome<sup>26</sup> or that only in highly selected patient groups the pantaloons cast test may  
48 be of value<sup>27</sup>.  
49  
50  
51  
52  
53  
54  
55  
56  
57  
58  
59  
60

1  
2  
3  
4  
5  
6  
7  
8  
9  
10  
11  
12  
13  
14  
15  
16  
17  
18  
19  
20  
21  
22  
23  
24  
25  
26  
27  
28  
29  
30  
31  
32  
33  
34  
35  
36  
37  
38  
39  
40  
41  
42  
43  
44  
45  
46  
47  
48  
49  
50  
51  
52  
53  
54  
55  
56  
57  
58  
59  
60

Provocative discography is a controversial test, which is highly variable in chronic pain patients and can also be positive in pain-free individuals<sup>28</sup>. Its value in predicting the outcome of fusion for low back pain is debated<sup>16,29</sup>, which was reflected in the completely contradictory respondents' opinions. Trial immobilization with a temporary external fixator is known for its high complication rate<sup>30</sup> and because of ambiguous results, its use is not recommended<sup>31</sup>. In the present survey, external fixation was not frequently used (94% never used it) and only 13% believed in its predictive value. Lumbar facet injections have been reported not to be predictive of either arthrodesis or nonsurgical treatment of back pain<sup>32</sup>. Accordingly, only 8% used facet joint blocks on a regular basis as a predictor of spinal fusion.

### *Clinical relevance and implications for clinicians and policymakers*

The lack of consensus among spine surgeons as found in the present survey could not be explained by differences in training or clinical experience. Apart from the use of discography and long multilevel fusions, the surgeons' discipline and years in practice did not appear to be of significant influence on treatment strategy. More likely, the observed heterogeneity of opinion reflects the absence of consistent high quality evidence for the validity of prognostic factors and predictive tests<sup>33</sup>. As there is no generally acknowledged superior approach for low back pain, substantial variations that exist between practices are caused by clinical uncertainty as to what constitutes the best of care.

In a survey among expert spine surgeons, bad patient selection and disproportionate preoperative expectations were considered to be the major factors for poor outcome in spinal surgery<sup>34</sup>. At present, consistent evidence on tests or tools that reliably predict the outcome of fusion is lacking<sup>35</sup>. Moreover, to provide a reliable estimation of the effectiveness of surgery, preferences of the individual patient, as well as psychological and social factors that may affect outcome, should be assessed<sup>36</sup>. To achieve realistic patient expectations of surgery, good patient counselling should be evidence based, i.e., determined by the best available clinical evidence from systematic research<sup>37</sup>, combined with the individual surgeon's expertise and expectation of treatment success<sup>38</sup>. As the present survey shows, prognostic factors are not consistently incorporated at all in the surgical decision making process. Lack of consensus among surgeons hampers the implementation of clinical guidelines, which are needed for proper patient counselling.

1  
2  
3  
4  
5 Future research should thus focus on identifying a subgroup of patients for whom  
6 spinal fusion is a predictable and effective treatment. If the results of fusion could be  
7 improved by better patient selection, there could be a role for spinal fusion as the  
8 treatment of choice for this particular subgroup of patients. A reliable prediction of  
9 surgical outcome, combined with the implementation of individual patient factors,  
10 would enable the instalment of clinical guidelines for surgical decision making. Such  
11 guidelines are needed, not only for patient counselling, but also for communication  
12 with insurers, policymakers and other health care providers who are involved in the  
13 management of chronic low back pain.  
14  
15  
16  
17  
18  
19  
20  
21  
22

### 23 *Conclusion*

24 The present survey consistently showed a lack of consensus among spine surgeons  
25 in surgical decision making. Despite high levels of training and continuous medical  
26 education, patient selection for fusion surgery in the treatment of chronic low back  
27 pain does not have a uniform evidence base in clinical practice.  
28  
29  
30  
31  
32  
33  
34  
35  
36  
37  
38  
39  
40  
41  
42  
43  
44  
45  
46  
47  
48  
49  
50  
51  
52  
53  
54  
55  
56  
57  
58  
59  
60

**Contributions of authors**

|    |                     |                                                  |
|----|---------------------|--------------------------------------------------|
| 1  |                     |                                                  |
| 2  |                     |                                                  |
| 3  |                     |                                                  |
| 4  |                     |                                                  |
| 5  |                     |                                                  |
| 6  |                     |                                                  |
| 7  | Paul Willems:       | Conception and design of the study               |
| 8  |                     | Acquisition, analysis and interpretation of data |
| 9  |                     | Drafting the article                             |
| 10 |                     | Approval of the final version to be published    |
| 11 |                     |                                                  |
| 12 |                     |                                                  |
| 13 |                     |                                                  |
| 14 |                     |                                                  |
| 15 |                     |                                                  |
| 16 | Rob de Bie:         | Design of the study                              |
| 17 |                     | Acquisition and analysis of data                 |
| 18 |                     | Revising the article                             |
| 19 |                     | Approval of the final version to be published    |
| 20 |                     |                                                  |
| 21 |                     |                                                  |
| 22 |                     |                                                  |
| 23 |                     |                                                  |
| 24 | Cumhur Öner:        | Design of the study                              |
| 25 |                     | Analysis and interpretation of data              |
| 26 |                     | Revising the article                             |
| 27 |                     | Approval of the final version to be published    |
| 28 |                     |                                                  |
| 29 |                     |                                                  |
| 30 |                     |                                                  |
| 31 |                     |                                                  |
| 32 |                     |                                                  |
| 33 | René Castelein:     | Design of the study                              |
| 34 |                     | Analysis and interpretation of data              |
| 35 |                     | Revising the article                             |
| 36 |                     | Approval of the final version to be published    |
| 37 |                     |                                                  |
| 38 |                     |                                                  |
| 39 |                     |                                                  |
| 40 |                     |                                                  |
| 41 |                     |                                                  |
| 42 | Marinus de Kleuver: | Conception and design of the study               |
| 43 |                     | Analysis and interpretation of data              |
| 44 |                     | Revising the article                             |
| 45 |                     | Approval of the final version to be published    |
| 46 |                     |                                                  |
| 47 |                     |                                                  |
| 48 |                     |                                                  |
| 49 |                     |                                                  |
| 50 |                     |                                                  |
| 51 |                     |                                                  |
| 52 |                     |                                                  |
| 53 |                     |                                                  |
| 54 |                     |                                                  |
| 55 |                     |                                                  |
| 56 |                     |                                                  |
| 57 |                     |                                                  |
| 58 |                     |                                                  |
| 59 |                     |                                                  |
| 60 |                     |                                                  |

## Declarations

The Corresponding Author has the right to grant on behalf of all authors and does grant on behalf of all authors, an exclusive licence (or non exclusive for government employees) on a worldwide basis to the BMJ Publishing Group Ltd to permit this article (if accepted) to be published in BMJ editions and any other BMJ PGL products and sublicences such use and exploit all subsidiary rights, as set out in their licence.

All authors have completed the Unified Competing Interest form at [www.icmje.org/coi\\_disclosure.pdf](http://www.icmje.org/coi_disclosure.pdf) (available on request from the corresponding author) and declare: no support from any organisation for the submitted work; no financial relationships with any organisations that might have an interest in the submitted work in the previous three years; no other relationships or activities that could appear to have influenced the submitted work.

## Funding

This research received no specific grant from any funding agency in the public, commercial or not-for-profit sectors.

## Acknowledgments

The authors would like to thank the members of the Dutch Spine Society for their participation in this study.



## References

1. Walker BF. The prevalence of low back pain: a systematic review of the literature from 1966 to 1998. *J Spinal Disord* 2000;13:205-17.
2. Cherkin DC, Deyo RA, Loeser JD, Bush T, Waddell G. An international comparison of back surgery rates. *Spine* 1994;19:1201-6.
3. Slobbe LCJ KG, Smit JM, Groen J, Meering WJ, Polder JJ. Kosten van ziekten in Nederland 2003. RIVM rapport 270751010. Bilthoven: RIVM, 2006.
4. Krismer M. Fusion of the lumbar spine. A consideration of the indications. *J Bone Joint Surg Br* 2002;84:783-94.
5. Turner JA, Ersek M, Herron L, Haselkorn J, Kent D, Ciol MA, Deyo R. Patient outcomes after lumbar spinal fusions. *Jama* 1992;268:907-11.
6. Gibson JN, Grant IC, Waddell G. The Cochrane review of surgery for lumbar disc prolapse and degenerative lumbar spondylosis. *Spine* 1999;24:1820-32.
7. Gibson JN, Waddell G. Surgery for degenerative lumbar spondylosis: updated Cochrane Review. *Spine* 2005;30:2312-20.
8. Fritzell P, Hagg O, Wessberg P, Nordwall A. 2001 Volvo Award Winner in Clinical Studies: Lumbar fusion versus nonsurgical treatment for chronic low back pain: a multicenter randomized controlled trial from the Swedish Lumbar Spine Study Group. *Spine* 2001;26:2521-32; discussion 32-4.
9. Fritzell P, Hagg O, Jonsson D, Nordwall A. Cost-effectiveness of lumbar fusion and nonsurgical treatment for chronic low back pain in the Swedish Lumbar Spine Study: a multicenter, randomized, controlled trial from the Swedish Lumbar Spine Study Group. *Spine* 2004;29:421-34; discussion Z3.
10. Brox JI, Sorensen R, Friis A, Nygaard O, Indahl A, Keller A, et al. Randomized clinical trial of lumbar instrumented fusion and cognitive intervention and exercises in patients with chronic low back pain and disc degeneration. *Spine* 2003;28:1913-21.
11. Fairbank J, Frost H, Wilson-MacDonald J, Yu LM, Barker K, Collins R. Randomised controlled trial to compare surgical stabilisation of the lumbar spine with an intensive rehabilitation programme for patients with chronic low back pain: the MRC spine stabilisation trial. *Bmj* 2005;330:1233.
12. Wilson-MacDonald J, Fairbank J, Frost H, Yu LM, Barker K, Collins R, Campbell H. The MRC spine stabilization trial: surgical methods, outcomes, costs, and complications of surgical stabilization. *Spine* 2008;33:2334-40.
13. Rivero-Arias O, Campbell H, Gray A, Fairbank J, Frost H, Wilson-MacDonald J. Surgical stabilisation of the spine compared with a programme of intensive rehabilitation for the management of patients with chronic low back pain: cost utility analysis based on a randomised controlled trial. *Bmj* 2005;330:1239.
14. DeBerard MS, Masters KS, Colledge AL, Schleusener RL, Schlegel JD. Outcomes of posterolateral lumbar fusion in Utah patients receiving workers' compensation: a retrospective cohort study. *Spine* 2001;26:738-46; discussion 47.
15. Deyo RA, Bass JE. Lifestyle and low-back pain. The influence of smoking and obesity. *Spine* 1989;14:501-6.
16. Colhoun E, McCall IW, Williams L, Cassar Pullicino VN. Provocation discography as a guide to planning operations on the spine. *J Bone Joint Surg Br* 1988;70:267-71.
17. Katz JN. Lumbar disc disorders and low-back pain: socioeconomic factors and consequences. *J Bone Joint Surg Am* 2006;88 Suppl 2:21-4.

18. Pincus T, Burton AK, Vogel S, Field AP. A systematic review of psychological factors as predictors of chronicity/disability in prospective cohorts of low back pain. *Spine* 2002;27:E109-20.
19. Patel N, Bagan B, Vadera S, Maltenfort MG, Deutsch H, Vaccaro AR, et al. Obesity and spine surgery: relation to perioperative complications. *J Neurosurg Spine* 2007;6:291-7.
20. Katz JN. Lumbar spinal fusion. Surgical rates, costs, and complications. *Spine* 1995;20:78S-83S.
21. Weinstein JN, Lurie JD, Olson PR, Bronner KK, Fisher ES. United States' trends and regional variations in lumbar spine surgery: 1992-2003. *Spine* 2006;31:2707-14.
22. Airaksinen O, Brox JI, Cedraschi C, Hildebrandt J, Klaber-Moffett J, Kovacs F, et al. Chapter 4. European guidelines for the management of chronic nonspecific low back pain. *Eur Spine J* 2006;15 Suppl 2:S192-300.
23. Boden SD, McCowin PR, Davis DO, Dina TS, Mark AS, Wiesel S. Abnormal magnetic-resonance scans of the cervical spine in asymptomatic subjects. A prospective investigation. *J Bone Joint Surg Am* 1990;72:1178-84.
24. Jarvik JJ, Hollingworth W, Heagerty P, Haynor DR, Deyo RA. The Longitudinal Assessment of Imaging and Disability of the Back (LAIDBack) Study: baseline data. *Spine* 2001;26:1158-66.
25. van Tulder MW, Assendelft WJ, Koes BW, Bouter LM. Spinal radiographic findings and nonspecific low back pain. A systematic review of observational studies. *Spine* 1997;22:427-34.
26. Axelsson P, Johnsson R, Stromqvist B, Nilsson LT, Akesson M. Orthosis as prognostic instrument in lumbar fusion: no predictive value in 50 cases followed prospectively. *J Spinal Disord* 1995;8:284-8.
27. Willems PC, Elmans L, Anderson PG, Jacobs WC, van der Schaaf DB, de Kleuver M. The value of a pantaloon cast test in surgical decision making for chronic low back pain patients: a systematic review of the literature supplemented with a prospective cohort study. *Eur Spine J* 2006;15:1487-94.
28. Carragee EJ, Tanner CM, Khurana S, Hayward C, Welsh J, Date E, et al. The rates of false-positive lumbar discography in select patients without low back symptoms. *Spine* 2000;25:1373-80; discussion 81.
29. Willems PC, Elmans L, Anderson PG, van der Schaaf DB, de Kleuver M. Provocative discography and lumbar fusion: is preoperative assessment of adjacent discs useful? *Spine (Phila Pa 1976)* 2007;32:1094-9; discussion 100.
30. Bednar DA. Failure of external spinal skeletal fixation to improve predictability of lumbar arthrodesis. *J Bone Joint Surg Am* 2001;83-A:1656-9.
31. Elmans L, Willems PC, Anderson PG, van Limbeek J, de Kleuver M, van der Schaaf D. Temporary external transpedicular fixation of the lumbosacral spine: a prospective, longitudinal study in 330 patients. *Spine* 2005;30:2813-6.
32. Esses SI, Moro JK. The value of facet joint blocks in patient selection for lumbar fusion. *Spine* 1993;18:185-90.
33. Hemingway H, Riley RD, Altman DG. Ten steps towards improving prognosis research. *Bmj* 2009;339:b4184.
34. Haefeli M, Elfering A, Aebi M, Freeman BJ, Fritzell P, Guimaraes Consciencia J, et al. What comprises a good outcome in spinal surgery? A preliminary survey among spine surgeons of the SSE and European spine patients. *Eur Spine J* 2008;17:104-16.

- 1  
2  
3 35. Deyo RA, Nachemson A, Mirza SK. Spinal-fusion surgery - the case for  
4 restraint. *N Engl J Med* 2004;350:722-6.  
5  
6 36. Waddell G. Low back pain: a twentieth century health care enigma. *Spine*  
7 1996;21:2820-5.  
8 37. Sackett DL, Rosenberg WM, Gray JA, Haynes RB, Richardson WS. Evidence  
9 based medicine: what it is and what it isn't. *Bmj* 1996;312:71-2.  
10 38. Campbell C, Guy A. 'Why can't they do anything for a simple back problem?' A  
11 qualitative examination of expectations for low back pain treatment and outcome. *J*  
12 *Health Psychol* 2007;12:641-52.  
13  
14  
15  
16  
17  
18  
19  
20  
21  
22  
23  
24  
25  
26  
27  
28  
29  
30  
31  
32  
33  
34  
35  
36  
37  
38  
39  
40  
41  
42  
43  
44  
45  
46  
47  
48  
49  
50  
51  
52  
53  
54  
55  
56  
57  
58  
59  
60

For peer review only

**Table 1** Characteristics of the 62 respondents

|                                 | <b>Orthopaedic<br/>surgeons (n)</b> | <b>Neurosurgeons<br/>(n)</b> | <b>All respondents<br/>(n)</b> |
|---------------------------------|-------------------------------------|------------------------------|--------------------------------|
| No. of respondents              | 46                                  | 16                           | 62                             |
| Age                             |                                     |                              |                                |
| < 50 years                      | 22                                  | 10                           | 32                             |
| ≥ 50 years                      | 24                                  | 6                            | 30                             |
| Clinical experience             |                                     |                              |                                |
| < 10 years                      | 13                                  | 5                            | 18                             |
| ≥ 10 years                      | 33                                  | 11                           | 44                             |
| Type of hospital                |                                     |                              |                                |
| University/specialized          | 13                                  | 5                            | 18                             |
| General                         | 33                                  | 11                           | 44                             |
| No. of fusions for<br>CLBP/year |                                     |                              |                                |
| 1-10                            | 24                                  | 9                            | 33                             |
| 10-25                           | 9                                   | 6                            | 15                             |
| 25-50                           | 7                                   | 1                            | 8                              |
| ≥ 50                            | 6                                   | 0                            | 6                              |

Abbreviation: CLBP = chronic low back pain; n = number

**Table 2** Respondents' opinion to what extent patient-specific prognostic factors influence their clinical decision making in the treatment of CLBP. The numbers listed are percentages of valid responses

|                                                               |                  |                  |                  |                   |
|---------------------------------------------------------------|------------------|------------------|------------------|-------------------|
| Maximum number of levels for fusion                           | 1 level          | 2 levels         | 3 or more levels | p-value*          |
|                                                               | <b>18 (30.5)</b> | <b>23 (39.0)</b> | <b>18 (30.5)</b> | <b>p&lt;0.001</b> |
| Minimum age patient                                           | Under 20 yrs     | 20 to 30 yrs     | 30 yrs or more   |                   |
|                                                               | <b>15 (24.6)</b> | <b>25 (41.0)</b> | <b>21 (34.4)</b> | <b>p&lt;0.001</b> |
| Maximum age patient                                           | 40 to 50 yrs     | 50 to 60 yrs     | 60 yrs or more   |                   |
|                                                               | <b>5 (8.1)</b>   | <b>12 (19.4)</b> | <b>45 (72.5)</b> | <b>NS</b>         |
| Minimal length conservative therapy                           | Less than 6 mo   | 6 mo to 1 yr     | 1 yr or more     |                   |
|                                                               | <b>3 (4.8)</b>   | <b>36 (58.1)</b> | <b>23 (37.1)</b> | <b>NS</b>         |
| Maximum Body Mass Index (BMI)                                 | Under 31         | 31 to 37         | 37 or more       |                   |
|                                                               | <b>29 (46.8)</b> | <b>18 (29.0)</b> | <b>15 (24.2)</b> | <b>p&lt;0.001</b> |
| Maximum number of cigarettes / day                            | 0                | 1 to 20          | 20 or more       |                   |
|                                                               | <b>29 (47.5)</b> | <b>7 (11.4)</b>  | <b>25 (40.9)</b> | <b>p&lt;0.001</b> |
| Referral overweight patients to dietician                     | Always           | Sometimes        | Never            |                   |
|                                                               | <b>29 (46.8)</b> | <b>20 (32.3)</b> | <b>13 (21.0)</b> | <b>p&lt;0.001</b> |
| Psychological screening referral                              | Always           | Sometimes        | Never            |                   |
|                                                               | <b>10 (16.2)</b> | <b>28 (45.2)</b> | <b>24 (38.7)</b> | <b>p&lt;0.001</b> |
| Different criteria for primary DDD versus prior spine surgery | Agree            | Neutral          | Disagree         |                   |
|                                                               | <b>44 (71.0)</b> | <b>8 (12.9)</b>  | <b>10 (16.1)</b> | <b>NS</b>         |
| Work status affects outcome                                   | Agree            | Neutral          | Disagree         |                   |
|                                                               | <b>29 (46.7)</b> | <b>17 (27.4)</b> | <b>16 (25.9)</b> | <b>p&lt;0.001</b> |

| Litigation procedures | Agree            | Neutral         | Disagree         |           |
|-----------------------|------------------|-----------------|------------------|-----------|
| affect outcome        | <b>43 (69.3)</b> | <b>9 (14.5)</b> | <b>10 (16.2)</b> | <b>NS</b> |

Abbreviation: DDD = degenerative disc disease, NS = not significant.

\*Chi-square test:  $p < 0.05$  means significantly less than 70% consensus, NS implies uniformity.

For peer review only

**Table 3a** Respondents' opinion on predictive tests for clinical decision making. The numbers listed are valid responses and respective percentages

| Predictive test                    | Agree (%) | Neutral (%) | Disagree (%) | p-value* |
|------------------------------------|-----------|-------------|--------------|----------|
| MRI sufficient for decision making | 10 (16.1) | 11 (17.7)   | 41 (66.1)    | NS       |
| Cast immobilization valuable test  | 25 (40.3) | 15 (24.2)   | 22 (35.5)    | <0.001   |
| Cast immobilization too unpleasant | 11 (17.7) | 16 (25.8)   | 35 (56.5)    | 0.028    |
| PD proven valuable test            | 23 (37.7) | 16 (26.2)   | 22 (36.0)    | <0.001   |
| PD too many complications          | 3 (4.9)   | 14 (23.0)   | 44 (72.1)    | NS       |
| TETF valuable test                 | 8 (13.4)  | 33 (55.0)   | 19 (31.6)    | 0.011    |
| TETF too many complications        | 20 (32.7) | 31 (50.8)   | 10 (16.4)    | 0.001    |

Abbreviations: MRI = magnetic resonance imaging, PD = provocative discography, TETF = temporary external transpedicular fixation, NS = not significant.

\*Chi-square test:  $p < 0.05$  means significantly less than 70% consensus, NS implies uniformity.

**Table 3b** The use of predictive tests by the surgeons in clinical practice. The numbers listed are valid responses and their respective percentages

| Use of test         | Always (%) | Sometimes (%) | Never (%) | p-value* |
|---------------------|------------|---------------|-----------|----------|
| Facet joint blocks  | 5 (8.1)    | 32 (51.6)     | 25 (40.3) | 0.002    |
| Cast immobilization | 20 (32.8)  | 23 (37.7)     | 18 (29.6) | <0.001   |
| PD                  | 25 (42.4)  | 10 (16.9)     | 24 (40.7) | <0.001   |
| TETF                | 0 (0.0)    | 3 (4.9)       | 58 (95.1) | NS       |

Abbreviations : PD = provocative discography, TETF = temporary external transpedicular fixation, NS = not significant.

\*Chi-square test:  $p < 0.05$  means significantly less than 70% consensus, NS implies uniformity.



**Appendix**

*Questionnaire on decision making for lumbar spinal fusion in chronic low back pain patients*

|                                                             |   |                                                                                 |                       |                                                                                                                             |
|-------------------------------------------------------------|---|---------------------------------------------------------------------------------|-----------------------|-----------------------------------------------------------------------------------------------------------------------------|
| 1<br>2<br>3<br>4<br>5<br>6<br>7<br>8<br>9<br>10<br>11<br>12 | 1 | What is your discipline?                                                        | 1<br>2<br>3           | Neurosurgery<br>Orthopaedic surgery<br>Other,<br>.....                                                                      |
| 13<br>14<br>15<br>16<br>17<br>18<br>19                      | 2 | What is your age?                                                               | 1<br>2<br>3<br>4<br>5 | Under 30 years<br>30 to 40 years<br>40 to 50 years<br>50 to 60 years<br>60 years or older                                   |
| 20<br>21<br>22<br>23<br>24<br>25                            | 3 | Since when do you perform spinal surgery?                                       | 1<br>2<br>3<br>4<br>5 | Less than 1 year<br>1 to 5 years<br>5 to 10 years<br>10 to 15 years<br>15 years or more                                     |
| 26<br>27<br>28<br>29<br>30<br>31<br>32                      | 4 | In what kind of hospital do you work?<br><i>(more than one answer possible)</i> | 1<br>2<br>3<br>4<br>5 | University hospital<br>General teaching hospital<br>General nonteaching hospital<br>Specialized hospital<br>Other,<br>..... |

**The next questions concern the indication for lumbar spinal fusion (or lumbar total disc replacement if appropriate) in patients with low back pain caused by degenerative lumbar disc disease without signs of neurological deficit, spinal stenosis, deformity or spondylolisthesis and in the absence of trauma, tumor, infections or other consuming illnesses, further to be referred to as chronic low back pain (CLBP) patients**

|                                                                                  |   |                                                                             |                       |                                                    |
|----------------------------------------------------------------------------------|---|-----------------------------------------------------------------------------|-----------------------|----------------------------------------------------|
| 33<br>34<br>35<br>36<br>37<br>38<br>39<br>40<br>41<br>42<br>43<br>44<br>45<br>46 | 5 | How many lumbar fusions do you perform each year in CLBP patients?          | 1<br>2<br>3<br>4<br>5 | 0<br>1 to 10<br>10 to 25<br>25 to 50<br>50 or more |
| 47<br>48<br>49<br>50<br>51<br>52                                                 | 6 | How many total disc replacements do you perform each year in CLBP patients? | 1<br>2<br>3<br>4<br>5 | 0<br>1 to 10<br>10 to 25<br>25 to 50<br>50 or more |
| 53<br>54<br>55<br>56<br>57<br>58<br>59<br>60                                     | 7 | What is for you the maximum number of levels to be fused in CLBP patients?  | 1<br>2<br>3<br>4      | 1<br>2<br>3<br>4 or more                           |

1  
2  
3  
4  
5  
6  
7  
8  
9  
10  
11  
12  
13  
14  
15  
16  
17  
18  
19  
20  
21  
22  
23  
24  
25  
26  
27  
28  
29  
30  
31  
32  
33  
34  
35  
36  
37  
38  
39  
40  
41  
42  
43  
44  
45  
46  
47  
48  
49  
50  
51  
52  
53  
54  
55  
56  
57  
58  
59  
60

- |     |                                                                                                                                  |          |                               |
|-----|----------------------------------------------------------------------------------------------------------------------------------|----------|-------------------------------|
|     |                                                                                                                                  | <b>5</b> | No maximum                    |
| 8a  | What is for you the absolute minimum age of a CLBP patient to be considered for lumbar fusion?                                   | <b>1</b> | Under 20 years                |
|     |                                                                                                                                  | <b>2</b> | 20 to 30 years                |
|     |                                                                                                                                  | <b>3</b> | 30 to 40 years                |
|     |                                                                                                                                  | <b>4</b> | 40 years or more              |
|     |                                                                                                                                  | <b>5</b> | No minimum age                |
| 8b  | What would be for you the absolute maximum age of a CLBP patient to be considered for lumbar fusion?                             | <b>1</b> | Under 40 years                |
|     |                                                                                                                                  | <b>2</b> | 40 to 50 years                |
|     |                                                                                                                                  | <b>3</b> | 50 to 60 years                |
|     |                                                                                                                                  | <b>4</b> | 60 years or older             |
|     |                                                                                                                                  | <b>5</b> | No maximum age                |
| 9   | How long should a CLBP patient at least have followed conservative therapy in order to be considered for lumbar fusion?          | <b>1</b> | 0 to 6 months                 |
|     |                                                                                                                                  | <b>2</b> | 6 months to 1 year            |
|     |                                                                                                                                  | <b>3</b> | 1 to 2 years                  |
|     |                                                                                                                                  | <b>4</b> | 2 years or longer             |
|     |                                                                                                                                  | <b>5</b> | No minimum                    |
| 10a | What would be for you the maximum weight of a 1.80 meter long male CLBP patient in order to be considered for lumbar fusion?     | <b>1</b> | Less than 80 kg               |
|     |                                                                                                                                  | <b>2</b> | 80 to 100 kg                  |
|     |                                                                                                                                  | <b>3</b> | 100 to 120 kg                 |
|     |                                                                                                                                  | <b>4</b> | 120 kg or more                |
|     |                                                                                                                                  | <b>5</b> | No maximum weight             |
| 10b | Do you send overweight CLBP patients to a dietician before considering lumbar fusion?                                            | <b>1</b> | Always                        |
|     |                                                                                                                                  | <b>2</b> | Frequently                    |
|     |                                                                                                                                  | <b>3</b> | Sometimes                     |
|     |                                                                                                                                  | <b>4</b> | Seldom                        |
|     |                                                                                                                                  | <b>5</b> | Never                         |
| 11  | What is for you the maximum number of cigarettes a CLBP patient is allowed to smoke in order to be considered for lumbar fusion? | <b>1</b> | 0 cigarettes per day          |
|     |                                                                                                                                  | <b>2</b> | 1 to 10 cigarettes per day    |
|     |                                                                                                                                  | <b>3</b> | 10 to 20 cigarettes per day   |
|     |                                                                                                                                  | <b>4</b> | 20 or more cigarettes per day |
|     |                                                                                                                                  | <b>5</b> | No maximum                    |
| 12  | Do you send CLBP patients for psychological screening before considering lumbar fusion?                                          | <b>1</b> | Always                        |
|     |                                                                                                                                  | <b>2</b> | Frequently                    |
|     |                                                                                                                                  | <b>3</b> | Sometimes                     |
|     |                                                                                                                                  | <b>4</b> | Seldom                        |
|     |                                                                                                                                  | <b>5</b> | Never                         |

**You are requested to indicate whether you agree or not with the following statements.**

|    |                                                                                                                                                                          | Fully agree | Partially agree | Neutral | Partially disagree | Fully disagree |
|----|--------------------------------------------------------------------------------------------------------------------------------------------------------------------------|-------------|-----------------|---------|--------------------|----------------|
|    |                                                                                                                                                                          | 1           | 2               | 3       | 4                  | 5              |
| 13 | The preoperative selection criteria for CLBP patients who had spine surgery before are substantially different from those for CLBP patients without prior spine surgery. | 1           | 2               | 3       | 4                  | 5              |
| 14 | The work status (Full or partial disability, long term sick leave) of a CLBP patient is of great influence on your decision to perform lumbar fusion.                    | 1           | 2               | 3       | 4                  | 5              |
| 15 | Involvement in litigation or workers compensation processes is of great influence on your decision making.                                                               | 1           | 2               | 3       | 4                  | 5              |
| 16 | Plain radiographs and MRI-findings in CLBP patients are sufficient for your decision to perform lumbar fusion.                                                           | 1           | 2               | 3       | 4                  | 5              |

**The next statements and questions concern clinical tests that may be helpful in decision making for lumbar fusion in CLBP patients.**

|     |                                                                                                                            |             |                 |           |                    |                |
|-----|----------------------------------------------------------------------------------------------------------------------------|-------------|-----------------|-----------|--------------------|----------------|
| 17a | Trial immobilization in a plaster jacket or pantaloon cast is a proven valuable test for decision making in CLBP patients. | 1           | 2               | 3         | 4                  | 5              |
|     |                                                                                                                            | Always      | Frequently      | Sometimes | Seldom             | Never          |
| 17b | Do you use this trial immobilization in a cast in CLBP patients?                                                           | 1           | 2               | 3         | 4                  | 5              |
|     |                                                                                                                            | Fully agree | Partially agree | Neutral   | Partially disagree | Fully disagree |
| 17c | Trial immobilization in a cast is too unpleasant for the patient to be executed.                                           | 1           | 2               | 3         | 4                  | 5              |

|    |     |                                                                                                                                      |                 |           |                    |
|----|-----|--------------------------------------------------------------------------------------------------------------------------------------|-----------------|-----------|--------------------|
| 1  |     |                                                                                                                                      |                 |           |                    |
| 2  |     |                                                                                                                                      |                 |           |                    |
| 3  |     |                                                                                                                                      |                 |           |                    |
| 4  |     |                                                                                                                                      |                 |           |                    |
| 5  |     | Fully agree                                                                                                                          | Partially agree | Neutral   | Partially disagree |
| 6  |     | <b>1</b>                                                                                                                             | <b>2</b>        | <b>3</b>  | <b>4</b>           |
| 7  | 18a | Provocative discography is a proven valuable test for decision making in CLBP patients.                                              |                 |           |                    |
| 8  |     |                                                                                                                                      |                 |           |                    |
| 9  |     |                                                                                                                                      |                 |           |                    |
| 10 |     |                                                                                                                                      |                 |           |                    |
| 11 |     | Always                                                                                                                               | Frequently      | Sometimes | seldom             |
| 12 |     | <b>1</b>                                                                                                                             | <b>2</b>        | <b>3</b>  | <b>4</b>           |
| 13 | 18b | Are CLBP patients in your practice selected for fusion by provocative discography?                                                   |                 |           |                    |
| 14 |     |                                                                                                                                      |                 |           |                    |
| 15 |     |                                                                                                                                      |                 |           |                    |
| 16 |     |                                                                                                                                      |                 |           |                    |
| 17 |     |                                                                                                                                      |                 |           |                    |
| 18 |     | Fully agree                                                                                                                          | Partially agree | Neutral   | Partially disagree |
| 19 |     | <b>1</b>                                                                                                                             | <b>2</b>        | <b>3</b>  | <b>4</b>           |
| 20 | 18c | Provocative discography has too many complications to be executed.                                                                   |                 |           |                    |
| 21 |     |                                                                                                                                      |                 |           |                    |
| 22 |     |                                                                                                                                      |                 |           |                    |
| 23 |     |                                                                                                                                      |                 |           |                    |
| 24 |     | Fully agree                                                                                                                          | Partially agree | Neutral   | Partially disagree |
| 25 |     | <b>1</b>                                                                                                                             | <b>2</b>        | <b>3</b>  | <b>4</b>           |
| 26 | 19a | Temporary external transpedicular fixation (TETF) of one or more segments is a proven valuable for decision making in CLBP patients. |                 |           |                    |
| 27 |     |                                                                                                                                      |                 |           |                    |
| 28 |     |                                                                                                                                      |                 |           |                    |
| 29 |     |                                                                                                                                      |                 |           |                    |
| 30 |     |                                                                                                                                      |                 |           |                    |
| 31 |     | Always                                                                                                                               | Frequently      | Sometimes | Seldom             |
| 32 |     | <b>1</b>                                                                                                                             | <b>2</b>        | <b>3</b>  | <b>4</b>           |
| 33 | 19b | Do you use TETF as a tool for decision making in CLBP patients?                                                                      |                 |           |                    |
| 34 |     |                                                                                                                                      |                 |           |                    |
| 35 |     |                                                                                                                                      |                 |           |                    |
| 36 |     |                                                                                                                                      |                 |           |                    |
| 37 |     | Fully agree                                                                                                                          | Partially agree | Neutral   | Partially disagree |
| 38 |     | <b>1</b>                                                                                                                             | <b>2</b>        | <b>3</b>  | <b>4</b>           |
| 39 | 19c | TETF has too many complications to be executed in CLBP patients.                                                                     |                 |           |                    |
| 40 |     |                                                                                                                                      |                 |           |                    |
| 41 |     |                                                                                                                                      |                 |           |                    |
| 42 |     |                                                                                                                                      |                 |           |                    |
| 43 |     | Always                                                                                                                               | Frequently      | Sometimes | Seldom             |
| 44 |     | <b>1</b>                                                                                                                             | <b>2</b>        | <b>3</b>  | <b>4</b>           |
| 45 | 20  | Are CLBP patients in your practice selected for fusion by facet joint blocks?                                                        |                 |           |                    |
| 46 |     |                                                                                                                                      |                 |           |                    |
| 47 |     |                                                                                                                                      |                 |           |                    |
| 48 |     |                                                                                                                                      |                 |           |                    |
| 49 |     |                                                                                                                                      |                 |           |                    |
| 50 |     |                                                                                                                                      |                 |           |                    |
| 51 |     |                                                                                                                                      |                 |           |                    |
| 52 |     |                                                                                                                                      |                 |           |                    |
| 53 |     |                                                                                                                                      |                 |           |                    |
| 54 |     |                                                                                                                                      |                 |           |                    |
| 55 |     |                                                                                                                                      |                 |           |                    |
| 56 |     |                                                                                                                                      |                 |           |                    |
| 57 |     |                                                                                                                                      |                 |           |                    |
| 58 |     |                                                                                                                                      |                 |           |                    |
| 59 |     |                                                                                                                                      |                 |           |                    |
| 60 |     |                                                                                                                                      |                 |           |                    |

- 1  
2  
3  
4 21 Do you use other tests as a selective tool 1 No  
5 for lumbar fusion in CLBP patients?  
6  
7 2 Yes,  
8 .....  
9 .....  
10 .....

11  
12 Could you rate on a scale ranging from 0 (no importance) to 10 0 to 10  
13 (maximum importance) how important you consider each of the following  
14 items as a selective tool for lumbar fusion in CLBP patients

- 15  
16 22a Plain radiographs .....  
17  
18 22b MRI-scan .....  
19  
20 22c Bone scintigraphy .....  
21  
22 22d History .....  
23  
24 22e Physical examination .....  
25  
26 22f Psychological screening .....  
27  
28 22g Patient's preferences .....  
29  
30 22h Facet joint blocks .....  
31  
32 22i Trial immobilization by pantaloon cast .....  
33  
34 22j Lumbar provocative discography .....  
35  
36 22k Temporary external transpedicular fixation .....  
37  
38  
39  
40  
41  
42

43  
44 Could you rate on a scale ranging from 0 (no influence) to 10 (maximal 0 to 10  
45 influence) to what extent your policy regarding the operative  
46 management of CLBP patients has been influenced by the following  
47 factors:

- 48  
49 23a Knowledge acquired during residency / training .....  
50  
51 23b Knowledge from the literature .....  
52  
53 23c Knowledge from courses or congresses .....  
54  
55 23d Knowledge based on clinical impression and experience .....  
56  
57  
58  
59  
60

1  
2  
3  
4  
5  
6  
7  
8  
9  
10  
11  
12  
13  
14  
15  
16  
17  
18  
19  
20  
21  
22  
23  
24  
25  
26  
27  
28  
29  
30  
31  
32  
33  
34  
35  
36  
37  
38  
39  
40  
41  
42  
43  
44  
45  
46  
47  
48  
49  
50  
51  
52  
53  
54  
55  
56  
57  
58  
59  
60

|     |                                                                                                                | Very satisfied | Fairly satisfied                       | Neutral   | Fairly unsatisfied | Very unsatisfied |
|-----|----------------------------------------------------------------------------------------------------------------|----------------|----------------------------------------|-----------|--------------------|------------------|
| 24  | Are you satisfied with the results of the management of CLBP patients in your practice?                        | 1              | 2                                      | 3         | 4                  | 5                |
| 25a | Are there protocols or guidelines in your clinic as to what CLBP patients can be considered for lumbar fusion? | 1              | Yes, please continue with question 25b |           |                    |                  |
|     |                                                                                                                | 2              | No, please continue with question 25c  |           |                    |                  |
|     |                                                                                                                | Always         | Frequently                             | Sometimes | Seldom             | Never            |
| 25b | If yes, do you adhere to these guidelines for every CLBP patient in your practice?                             | 1              | 2                                      | 3         | 4                  | 5                |
|     |                                                                                                                | Fully agree    | Partially agree                        | Neutral   | Partially disagree | Fully disagree   |
| 25c | If no, do you think there should be guidelines for the management of CLBP patients?                            | 1              | 2                                      | 3         | 4                  | 5                |

**Research Checklist:** + = completed, NA = not applicable

Spinal fusion for chronic low back pain: No consensus in clinical decision making.

Results of a nationwide survey among spine surgeons

The STROBE statement for cross-sectional studies was used as this was considered to be the most appropriate checklist for the present survey among spine surgeons.

STROBE Statement—Checklist of items that should be included in reports of *cross-sectional studies*

|                                | Item No | Recommendation                                                                                                                                                                                                                                                                                                                             |
|--------------------------------|---------|--------------------------------------------------------------------------------------------------------------------------------------------------------------------------------------------------------------------------------------------------------------------------------------------------------------------------------------------|
| <b>Title and abstract</b>      | 1       | (a) Indicate the study's design with a commonly used term in the title or the abstract                                                                                                                                                                                                                                                     |
| +                              |         | (b) Provide in the abstract an informative and balanced summary of what was done and what was found                                                                                                                                                                                                                                        |
| <b>Introduction</b>            |         |                                                                                                                                                                                                                                                                                                                                            |
| + Background/rationale         | 2       | Explain the scientific background and rationale for the investigation being reported                                                                                                                                                                                                                                                       |
| + Objectives                   | 3       | State specific objectives, including any prespecified hypotheses                                                                                                                                                                                                                                                                           |
| <b>Methods</b>                 |         |                                                                                                                                                                                                                                                                                                                                            |
| + Study design                 | 4       | Present key elements of study design early in the paper                                                                                                                                                                                                                                                                                    |
| + Setting                      | 5       | Describe the setting, locations, and relevant dates, including periods of recruitment, exposure, follow-up, and data collection                                                                                                                                                                                                            |
| + Participants                 | 6       | (a) Give the eligibility criteria, and the sources and methods of selection of participants                                                                                                                                                                                                                                                |
| + Variables                    | 7       | Clearly define all outcomes, exposures, predictors, potential confounders, and effect modifiers. Give diagnostic criteria, if applicable                                                                                                                                                                                                   |
| + Data sources/<br>measurement | 8*      | For each variable of interest, give sources of data and details of methods of assessment (measurement). Describe comparability of assessment methods if there is more than one group                                                                                                                                                       |
| + Bias                         | 9       | Describe any efforts to address potential sources of bias                                                                                                                                                                                                                                                                                  |
| + Study size                   | 10      | Explain how the study size was arrived at                                                                                                                                                                                                                                                                                                  |
| + Quantitative variables       | 11      | Explain how quantitative variables were handled in the analyses. If applicable, describe which groupings were chosen and why                                                                                                                                                                                                               |
| + Statistical methods          | 12      | (a) Describe all statistical methods, including those used to control for confounding<br>(b) Describe any methods used to examine subgroups and interactions<br>(c) Explain how missing data were addressed<br>(d) If applicable, describe analytical methods taking account of sampling strategy<br>(e) Describe any sensitivity analyses |
| <b>Results</b>                 |         |                                                                                                                                                                                                                                                                                                                                            |
| + Participants                 | 13*     | (a) Report numbers of individuals at each stage of study—eg numbers potentially eligible, examined for eligibility, confirmed eligible, included in the study, completing follow-up, and analysed<br>(b) Give reasons for non-participation at each stage<br>(c) Consider use of a flow diagram                                            |
| + Descriptive data             | 14*     | (a) Give characteristics of study participants (eg demographic, clinical, social) and information on exposures and potential confounders                                                                                                                                                                                                   |

|                          |     |                                                                                                                                                                                                              |
|--------------------------|-----|--------------------------------------------------------------------------------------------------------------------------------------------------------------------------------------------------------------|
|                          |     | (b) Indicate number of participants with missing data for each variable of interest                                                                                                                          |
| + Outcome data           | 15* | Report numbers of outcome events or summary measures                                                                                                                                                         |
| NA Main results          | 16  | (a) Give unadjusted estimates and, if applicable, confounder-adjusted estimates and their precision (eg, 95% confidence interval). Make clear which confounders were adjusted for and why they were included |
|                          |     | (b) Report category boundaries when continuous variables were categorized                                                                                                                                    |
|                          |     | (c) If relevant, consider translating estimates of relative risk into absolute risk for a meaningful time period                                                                                             |
| + Other analyses         | 17  | Report other analyses done—eg analyses of subgroups and interactions, and sensitivity analyses                                                                                                               |
| <b>Discussion</b>        |     |                                                                                                                                                                                                              |
| + Key results            | 18  | Summarise key results with reference to study objectives                                                                                                                                                     |
| + Limitations            | 19  | Discuss limitations of the study, taking into account sources of potential bias or imprecision. Discuss both direction and magnitude of any potential bias                                                   |
| + Interpretation         | 20  | Give a cautious overall interpretation of results considering objectives, limitations, multiplicity of analyses, results from similar studies, and other relevant evidence                                   |
| + Generalisability       | 21  | Discuss the generalisability (external validity) of the study results                                                                                                                                        |
| <b>Other information</b> |     |                                                                                                                                                                                                              |
| NA Funding               | 22  | Give the source of funding and the role of the funders for the present study and, if applicable, for the original study on which the present article is based                                                |

\*Give information separately for exposed and unexposed groups.

**Note:** An Explanation and Elaboration article discusses each checklist item and gives methodological background and published examples of transparent reporting. The STROBE checklist is best used in conjunction with this article (freely available on the Web sites of PLoS Medicine at <http://www.plosmedicine.org/>, Annals of Internal Medicine at <http://www.annals.org/>, and Epidemiology at <http://www.epidem.com/>). Information on the STROBE Initiative is available at [www.strobe-statement.org](http://www.strobe-statement.org).



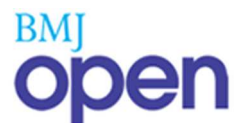

**Clinical decision making in spinal fusion for chronic low back pain.  
Results of a nationwide survey among spine surgeons**

|                                 |                                                                                                                                                                                                                                                 |
|---------------------------------|-------------------------------------------------------------------------------------------------------------------------------------------------------------------------------------------------------------------------------------------------|
| Journal:                        | <i>BMJ Open</i>                                                                                                                                                                                                                                 |
| Manuscript ID:                  | bmjopen-2011-000391.R1                                                                                                                                                                                                                          |
| Article Type:                   | Research                                                                                                                                                                                                                                        |
| Date Submitted by the Author:   | 08-Nov-2011                                                                                                                                                                                                                                     |
| Complete List of Authors:       | willems, Paul; Maastricht UMC, Orthopedics<br>de Bie, Rob; Maastricht University, Epidemiology<br>Öner, Cumhur; UMC Utrecht, Orthopedics<br>Castelein, René; UMC Utrecht, Orthopedics<br>de Kleuver, Marinus; Sint Maartenskliniek, Orthopedics |
| <b>Primary Subject Heading</b>: | Evidence-based practice                                                                                                                                                                                                                         |
| Secondary Subject Heading:      | Surgery, Epidemiology                                                                                                                                                                                                                           |
| Keywords:                       | Back pain < ORTHOPAEDIC & TRAUMA SURGERY, Spine < ORTHOPAEDIC & TRAUMA SURGERY, Quality in health care < HEALTH SERVICES ADMINISTRATION & MANAGEMENT, Adult surgery < SURGERY                                                                   |
|                                 |                                                                                                                                                                                                                                                 |

SCHOLARONE™  
Manuscripts

## Clinical decision making in spinal fusion for chronic low back pain

### Results of a nationwide survey among spine surgeons

Paul Willems, MD<sup>1</sup>, Rob de Bie<sup>2</sup>, MD, PhD, Cumhur Öner<sup>3</sup>, MD, PhD, René Castelein, MD, PhD<sup>3</sup> and Marinus de Kleuver, MD, PhD<sup>4</sup>

<sup>1</sup>Department of Orthopaedics, Research School Caphri, Maastricht University Medical Center, P.O. Box 5800, 6202 AZ Maastricht, The Netherlands;

<sup>2</sup>Department of Epidemiology, Research School Caphri, Maastricht University Medical Center, P.O. Box 5800, 6202 AZ Maastricht, The Netherlands;

<sup>3</sup>Department of Orthopaedics, University Medical Center Utrecht, P.O. Box 85500, 3508 GA Utrecht, The Netherlands;

<sup>4</sup>Department of Orthopaedics, Sint Maartenskliniek, Nijmegen, P.O. Box 9011, 6500 GM Nijmegen, The Netherlands

Correspondence: Paul Willems, MD  
Department of Orthopaedics  
Research School Caphri  
Maastricht University Medical Center  
P. Debyelaan 25  
P.O. Box 5800  
6202 AZ Maastricht  
The Netherlands  
Fax: 00-31 (0) 43-3874893  
Tel: 00-31 (0) 43-3877038  
[p.willems@mumc.nl](mailto:p.willems@mumc.nl)

## Article summary

### Article focus

- What is the level of professional consensus among spine surgeons regarding spinal fusion surgery for chronic low back pain?
- How are tests for patient selection appreciated and to what extent are they used in clinical practice?
- Are prognostic patient factors incorporated in the process of surgical decision making for chronic low back pain?

### Key messages

- In clinical practice there is no professional consensus on surgical treatment strategy for chronic low back pain.
- Prognostic patient factors as well as tests for patient selection are not consistently used in clinical decision making for spinal fusion.
- Because of a lack of consensus on spinal fusion strategy for chronic low back pain in clinical practice, no guidelines for proper patient counselling can be installed at present.

### Strengths and limitations

A survey among physicians provides valuable insight in the actual decision making process in clinical practice. Understanding contributory factors in treatment strategy may help in the creation of consensus guidelines.

The introduction of an interviewer bias could be avoided by the use of a neutral intermediary instead of direct questions from peers in spine surgery.

1  
2  
3 This study focussed on surgeon members of the Dutch Spine Society whose practice  
4 may not reflect that of all surgeons performing spinal fusion for chronic low back pain.  
5 Moreover, no information on conservative treatment options was acquired.  
6  
7  
8

9  
10 To define consensus we chose for uniformity of opinion of at least 70%, which we  
11 considered to be sufficient for implementation in guidelines. Such a cut-off level  
12 remains arbitrary.  
13  
14  
15  
16  
17  
18  
19  
20  
21  
22  
23  
24  
25  
26  
27  
28  
29  
30  
31  
32  
33  
34  
35  
36  
37  
38  
39  
40  
41  
42  
43  
44  
45  
46  
47  
48  
49  
50  
51  
52  
53  
54  
55  
56  
57  
58  
59  
60

## Structured abstract

**Objectives:** To assess the use of prognostic patient factors and predictive tests in clinical decision making for spinal fusion in patients with chronic low back pain.

**Design and setting:** Nationwide survey among spine surgeons in the Netherlands.

**Participants:** Surgeon members of the Dutch Spine Society were questioned on their surgical treatment strategy for chronic low back pain.

**Primary and secondary outcome measures:** The surgeons' opinion on the use of prognostic patient factors and predictive tests for patient selection were addressed on Likert scales, and the degree of uniformity was assessed. In addition, the influence of surgeon specific factors, such as clinical experience and training, on decision making was determined.

**Results:** The comments from 62 surgeons (70% response rate) were analysed. Forty-four surgeons (71%) had extensive clinical experience. There was a statistically significant lack of uniformity of opinion in 7 of the 11 items on prognostic factors and 8 of the 11 items on predictive tests, respectively. Imaging was valued much higher than predictive tests, psychological screening, or patient preferences (All  $p < 0.01$ ). Apart from the use of discography and long multi-segment fusions, differences in training or clinical experience did not appear to be of significant influence on treatment strategy.

**Conclusions:** The present survey showed a lack of consensus among spine surgeons on the appreciation and use of predictive tests. Prognostic patient factors were not consistently incorporated in their treatment strategy either. Clinical decision making for spinal fusion to treat chronic low back pain does not have a uniform evidence base in practice. Future research should focus on identifying subgroups of patients for whom spinal fusion is an effective treatment, as only a reliable prediction of surgical outcome, combined with the implementation of individual patient factors, may enable the instalment of consensus guidelines for surgical decision making in patients with chronic low back pain.

**Data sharing statement:** All data can be found on doi:10.5061/dryad.7p65c8p4.

## Introduction

Chronic low back pain has become one of the main causes of disability in the industrialised world with reported life-time prevalences of up to 85%<sup>1</sup>. In the Netherlands, a small Western European country (16.5 million inhabitants) with a relatively high rate of spine surgery<sup>2</sup>, the annual costs of back pain were estimated at 4.4 billion euros, which are mainly employment-related costs (lost productivity due to work absenteeism)<sup>3</sup>.

Spinal fusion of a painful or degenerative segment can be beneficial to some patients, but it remains a controversial treatment<sup>4,5</sup>. In the first Cochrane review in 1999, no evidence on the effectiveness of fusion for lumbar degenerative disc disease or low back pain was found as compared to natural history, placebo or conservative treatment<sup>6</sup>. In the updated Cochrane review in 2005<sup>7</sup>, two randomized controlled trials (RCT) were included. First, a Swedish trial reported a better outcome of patients treated with spinal fusion compared to patients who received standard conservative care<sup>8</sup>, although at longer follow-up this beneficial effect attenuated<sup>9</sup>. Next, a Norwegian RCT that compared fusion surgery to cognitive behavioural based exercise therapy<sup>10</sup> showed similar results for both treatment modalities at 1 year follow-up. Similarly, in the more recent British spine stabilization trial, no clear evidence was found that spinal fusion was more beneficial than an intensive rehabilitation program at 2 years follow-up<sup>11</sup>. Moreover, fusion had a much higher complication rate in this trial and appeared to be less cost-effective than intensive rehabilitation<sup>12,13</sup>.

Proper patient selection may improve the outcome of fusion for which several prognostic factors and predictive tests have been reported<sup>4,14-19</sup>. However, epidemiological research reveals large variation in fusion rates between countries and even between different regions within the same country<sup>20,21</sup>, suggesting a poor level of professional consensus. Understanding contributory factors in treatment strategy of surgeons, may clarify some of these observed variations and help create consensus guidelines for clinical decision making.

Therefore, we conducted a national survey among spine surgeons in the Netherlands with the aim to assess the surgeons' opinion on prognostic patient factors known from the literature, as well as the use of predictive tests for spinal fusion in clinical practice. In addition, the degree of uniformity in decision making was determined.

## Materials and Methods

A 25-question survey (see Appendix) was sent by mail to all surgeon members of the Dutch Spine Society, by Memic, a Center for Data and Information Management, University of Maastricht, the Netherlands ([www.memic.unimaas.nl](http://www.memic.unimaas.nl)). In an accompanying letter the background rationale for the enquiry, as well as the voluntary and confidential nature was stressed and the surgeons were reassured that individual comments would remain anonymous.

The questionnaire concerned the selection for spinal fusion of patients with low back pain caused by degenerative lumbar disc disease without signs of neurological deficit, spinal stenosis, deformity or spondylolisthesis and in the absence of trauma, tumor or infections. This group was further referred to as chronic low back pain patients. For clarity the questionnaire had first been evaluated and revised by a clinical researcher and two orthopaedic surgeons. Most questions could be answered according to a 5-point Likert scale. Surgeon specific factors (e.g., discipline, clinical experience), the influence of patient factors (prognostic factors as reported in literature), and the use of tests for patient selection (e.g., provocative discography), were addressed. The respondents were specifically asked to rely on their own individual opinion and management in practice.

Those who had not responded received a second call by mail after two months, and final inclusion was set another two months later. Data were entered into Excel™ (Microsoft, Corp., Redmond, WA) and all inconsistencies were resolved. Unanswered questions were coded as missing. Descriptive statistics was used in which all frequencies were based on the number of valid responders.

For analysis the answers on the 5-point Likert scale were merged into one intermediate option (“neutral”) and 2 opposite categories (“always/almost always” versus “never/almost never” and “fully/globally agree” versus “globally/fully disagree”). The data were processed with Statistical Package for the Social Sciences software (SPSS, Inc., Chicago, IL). Pearson’s chi-square test was used to evaluate whether surgeon specific factors were associated with clinical decision making. Uniformity of opinion was defined to be present if 70% or more of the respondents answered similarly. In other words, there was no consensus if the proportion of the largest category was statistically significantly lower than 70% (Pearson’s chi-square test). Differences in mean values rating the impact of factors on decision making,

1  
2  
3  
4  
5  
6  
7  
8  
9  
10  
11  
12  
13  
14  
15  
16  
17  
18  
19  
20  
21  
22  
23  
24  
25  
26  
27  
28  
29  
30  
31  
32  
33  
34  
35  
36  
37  
38  
39  
40  
41  
42  
43  
44  
45  
46  
47  
48  
49  
50  
51  
52  
53  
54  
55  
56  
57  
58  
59  
60

were tested by Independent t-test for equality of means. The level of significance was set at  $p < 0.05$ .

For peer review only



## Results

Nine of the 150 surveyed surgeons (89 orthopaedic surgeons and 61 neurosurgeons) had ended their professional career and 9 respondents stated not to perform spinal surgery anymore. Of the remaining 132 active spine surgeons, 93 (70%) completed and returned the questionnaire. Thirty-one of the 93 respondents (33%) declared not to perform spinal fusion for low back pain and were excluded from further analysis. The characteristics of the final group of 62 respondents are listed in Table 3. The level of experience for neurosurgeons and orthopaedic surgeons was equal: 11 of 16 (69%) versus 33 of 46 (72%) worked ten years or more in clinical practice, respectively.

### *Prognostic factors*

The respondents' comments on prognostic factors are listed in Table 4. For 7 of the 11 items there was no consensus (significantly less than 70% uniformity of opinion). More than 70% of the respondents would fuse patients over 60 years old for back pain. Years of clinical experience or specialty did not appear to be of influence ( $p=0.504$ , and  $p=0.690$ , respectively).

**Eight of 18 academic surgeons and 32 of 43 spine surgeons working in general hospitals operated on patients below 30 for back pain ( $p=0.025$ ).**

Fourteen of 46 orthopaedic surgeons fused patients below 20 for back pain, versus only 1 of 15 neurosurgeons ( $p=0.063$ ). Eighteen orthopaedic surgeons performed fusion of 3 or more levels for low back pain, whereas no neurosurgeon did ( $p=0.003$ ).

### *Tests for patient selection*

The surgeons' appreciation and use of predictive tests are listed in Tables 5a and 5b, respectively. Apart from MRI, there was no uniformity regarding the value of these tests for clinical decision making.

Mainly orthopaedic surgeons (21 of 46, versus 2 of 16 neurosurgeons,  $p=0.025$ ) considered provocative discography to be a valid predictor of fusion. Spine surgeons working in general hospitals (20 of 43), appeared to believe more in the test than academic surgeons did (3 of 18,  $p=0.028$ ). There was no relation with clinical experience ( $p=0.406$ ). Apart from the use of discography, differences in discipline or clinical experience did not appear to be of significant influence on treatment strategy.

In the evaluation of chronic low back pain no other predictive tests than those mentioned in Tables 5a and 5b were used on a regular basis.

#### *Individual decision making in clinical practice*

Table 1 and figure 1 shows the importance of predictive tests and prognostic factors for clinical decision making as rated on a scale from 0 to 10. Patient history and imaging were valued significantly higher than predictive tests, psychological screening or patient preferences (all respective comparisons:  $p < 0.01$ , Independent t-test).

The impact of surgeon specific factors on treatment strategy is listed in table 2 and figure 2. Experience was rated highest (mean  $\pm$  sd,  $8.0 \pm 1.7$ ), as compared to findings from literature ( $7.7 \pm 1.1$ ,  $p = 0.26$ ), scientific courses ( $7.3 \pm 1.4$ ,  $p = 0.01$ ), and training ( $6.8 \pm 2.8$ ,  $p < 0.01$ ).

Twenty-seven (45%) surgeons responded to have a protocol for decision making to which they frequently or always adhered. Of those 35 respondents who did not have such a protocol, 23 (68%) replied that there should be guidelines. In other words, 50 respondents (83%) felt that clinical guidelines in the management of CLBP patients are prerequisite.

**Table 1** The importance of listed factors in clinical decision making (presented as mean  $\pm$  sd) as rated by the respondents on a scale from 0 (no importance) to 10 (maximal importance). Abbreviations: MRI = magnetic resonance imaging, TETF = temporary external transpedicular fixation

|                         | Mean $\pm$ sd   |
|-------------------------|-----------------|
| History                 | $9.06 \pm 1.11$ |
| MRI                     | $8.69 \pm 1.24$ |
| Plain radiographs       | $8.11 \pm 2.01$ |
| Physical examination    | $7.53 \pm 2.15$ |
| Discography             | $5.34 \pm 3.09$ |
| Pantaloon cast          | $4.95 \pm 2.99$ |
| Patient's preference    | $4.75 \pm 2.25$ |
| Psychological screening | $4.70 \pm 2.42$ |
| Facet joint block       | $4.06 \pm 2.46$ |
| Bone scintigraphy       | $3.80 \pm 2.59$ |
| TETF                    | $1.96 \pm 2.59$ |

**Table 2**

**Table for figure 2** Factors that influence clinical decision making for chronic low back pain (presented as mean  $\pm$  sd), as rated by respondents on a scale from 0 (no influence) to 10 (maximal influence)

|                     | Mean $\pm$ sd   |
|---------------------|-----------------|
| Residency/training  | 6.76 $\pm$ 2.80 |
| Literature          | 7.72 $\pm$ 1.11 |
| Course/congress     | 7.31 $\pm$ 1.37 |
| Clinical experience | 8.02 $\pm$ 1.72 |

## Discussion

This study presents the results of the first nationwide survey among spine surgeons regarding clinical decision making for spinal fusion in patients with chronic low back pain. The response rate was adequate (70%) and the majority of the respondents (71%) had extensive clinical experience in spinal surgery. A considerable heterogeneity in the use and appreciation of predictive tests was observed. Prognostic patient factors were not consistently incorporated in clinical decision making.

### *Strengths and weaknesses*

This survey focused on surgeon members of the Dutch Spine Society whose practice may not reflect that of all surgeons performing spinal fusion for low back pain. This may have produced a selection bias. It is reasonable, however, to expect that surgeons with a special interest in the spine are exactly those to be most aware of guidelines and research findings in the field.

To define consensus we chose for uniformity of opinion of 70% or more of the respondents. We felt that this level of agreement should be sufficient for implementation in guidelines. Such a cut-off level remains, of course, arbitrary and debatable.

The introduction of an interviewer bias could be avoided by employing Memic, Center for Data and Information Management, as a neutral intermediary. In this way, surgeons could feel free to answer what they personally felt or practiced, as opposed to what they thought would be considered "correct".

For statistical analysis the 5-point Likert scale responses were merged into 3 categories, which may have simplified the respondents' opinion on the management of low back pain in practice.

### *Comparison with related research*

**According to literature**, older age is an acknowledged predictor of poor outcome<sup>14</sup>. Nevertheless, almost three quarters (73%) of the **surgeons** fused patients above 60 for low back pain.

1  
2  
3 In literature, 2 or 3-level fusions have proven higher rates of pseudarthrosis with  
4 lower patient satisfaction as compared to single level fusions<sup>5,14</sup>. Over 30% of the  
5 surgeons would consider fusion of 3 levels or more.  
6

7  
8 Although the literature says that fusion surgery is not recommended unless 2 years of  
9 conservative treatment have failed<sup>22</sup>, 63% of the surgeons felt that less than 1 year of  
10 conservative therapy is enough to consider fusion.  
11

12  
13 In literature, obesity is an independent risk factor for low back pain, and surgery in  
14 these patients is significantly associated with major complications, such as thrombo-  
15 embolism and infection<sup>19</sup>. Nevertheless, 53% of the surgeons would operate for  
16 chronic low back pain on obese patients and 24% on the morbid obese. Less than  
17 half of the surgeons (47%) consistently referred overweight patients to a dietician.  
18

19  
20 In literature, smoking is known to be an independent risk factor for low back pain<sup>15</sup>,  
21 and associated with worse results of spinal fusion<sup>12</sup>. Among surgeons, there was no  
22 consensus regarding smoking: About 41% would fuse heavy smokers, whereas 48%  
23 would not operate smokers for back pain.  
24

25  
26 According to literature, psychologically stressful work is associated with low back  
27 pain and disability<sup>17</sup>, and it has been reported that psychological distress, depressive  
28 mood and somatisation lead to an increased risk of chronicity<sup>18</sup>. In addition,  
29 presurgical depression is associated with worse patient outcome after lumbar  
30 fusion<sup>14</sup>. In contrast, only 16% of the surgeons referred patients routinely for  
31 psychological screening and 39% never referred for this purpose at all.  
32

33  
34 There is strong evidence in literature that clinical interventions are not effective in  
35 returning patients back to work once they have been off work for a longer time<sup>22</sup>.  
36 About half of the surgeons agreed that the work status of patients with low back pain  
37 affects outcome considerably and 69% acknowledged that litigation or workers'  
38 compensation are of great influence on decision making, as they have been  
39 associated with persisting pain and disability<sup>17</sup>.  
40

41  
42 Two-thirds (66%) of the respondents considered findings on plain radiographs and  
43 MRI-scan alone to be insufficient for surgical decision making (Table 3a). This is in  
44 accordance with the literature indicating that degenerative or black discs on MRI do  
45 not appear to have a strong clinical relevance<sup>23,24</sup> and that there is no correlation  
46 between radiographic signs of degeneration and clinical outcome<sup>25</sup>.  
47

48  
49 Opinion differed about trial immobilization with a pantaloon cast: 40% of the  
50 respondents agreed that it is a valuable test and 36% disagreed. This resembles  
51  
52  
53  
54  
55  
56  
57  
58  
59  
60

1  
2  
3 conflicting reports from the literature claiming that the test is not predictive of fusion  
4 outcome<sup>26</sup> or that only in highly selected patient groups the pantaloons cast test may  
5 be of value<sup>27</sup>.  
6

7  
8 According to literature, provocative discography is a controversial test, which is highly  
9 variable in chronic pain patients and can also be positive in pain-free individuals<sup>28</sup>. Its  
10 value in predicting the outcome of fusion for low back pain is debated<sup>16,29</sup>, which was  
11 reflected in the completely contradictory surgeons' opinions. Trial immobilization with  
12 a temporary external fixator is known for its high complication rate<sup>30</sup> and because of  
13 ambiguous results, its use is not recommended<sup>31</sup>. In the present survey, external  
14 fixation was not frequently used (94% never used it) and only 13% of the surgeons  
15 believed in its predictive value.  
16

17  
18 In literature, lumbar facet injections have been reported not to be predictive of either  
19 arthrodesis or nonsurgical treatment of back pain<sup>32</sup>. Accordingly, only 8% of the  
20 surgeons used facet joint blocks on a regular basis as a predictor of spinal fusion.  
21

#### 22 23 24 25 26 27 28 *Clinical relevance and implications for clinicians and policymakers*

29 The lack of consensus among spine surgeons as found in the present survey could  
30 not be explained by differences in training or clinical experience. Apart from the use  
31 of discography and long multilevel fusions, the surgeons' discipline and years in  
32 practice did not appear to be of significant influence on treatment strategy. More  
33 likely, the observed heterogeneity of opinion reflects the absence of consistent high  
34 quality evidence for the validity of prognostic factors and predictive tests<sup>33</sup>. As there  
35 is no generally acknowledged superior approach for low back pain, substantial  
36 variations that exist between practices are caused by clinical uncertainty as to what  
37 constitutes the best of care.  
38

39 In a survey among expert spine surgeons, bad patient selection and disproportionate  
40 preoperative expectations were considered to be the major factors for poor outcome  
41 in spinal surgery<sup>34</sup>. At present, consistent evidence on tests or tools that reliably  
42 predict the outcome of fusion is lacking<sup>35</sup>. Moreover, to provide a reliable estimation  
43 of the effectiveness of surgery, preferences of the individual patient, as well as  
44 psychological and social factors that may affect outcome, should be assessed<sup>36</sup>. To  
45 achieve realistic patient expectations of surgery, good patient counselling should be  
46 evidence based, i.e., determined by the best available clinical evidence from  
47 systematic research<sup>37</sup>, combined with the individual surgeon's expertise and  
48  
49  
50  
51  
52  
53  
54  
55  
56  
57  
58  
59  
60

1  
2  
3 expectation of treatment success<sup>38</sup>. As the present survey shows, prognostic factors  
4 are not consistently incorporated at all in the surgical decision making process. Lack  
5 of consensus among surgeons hampers the implementation of clinical guidelines,  
6 which are needed for proper patient counselling.  
7  
8  
9

10  
11 Future research should thus focus on identifying a subgroup of patients for whom  
12 spinal fusion is a predictable and effective treatment. If the results of fusion could be  
13 improved by better patient selection, there could be a role for spinal fusion as the  
14 treatment of choice for this particular subgroup of patients. A reliable prediction of  
15 surgical outcome, combined with the implementation of individual patient factors,  
16 would enable the instalment of clinical guidelines for surgical decision making. Such  
17 guidelines are needed, not only for patient counselling, but also for communication  
18 with insurers, policymakers and other health care providers who are involved in the  
19 management of chronic low back pain.  
20  
21  
22  
23  
24  
25  
26

### 27 *Conclusion*

28  
29 The present survey consistently showed a lack of consensus among spine surgeons  
30 in surgical decision making. Despite high levels of training and continuous medical  
31 education, patient selection for fusion surgery in the treatment of chronic low back  
32 pain does not have a uniform evidence base in clinical practice.  
33  
34  
35  
36  
37  
38  
39  
40  
41  
42  
43  
44  
45  
46  
47  
48  
49  
50  
51  
52  
53  
54  
55  
56  
57  
58  
59  
60

**Contributions of authors**

Paul Willems:           Conception and design of the study  
Acquisition, analysis and interpretation of data  
Drafting the article  
Approval of the final version to be published

Rob de Bie:            Design of the study  
Acquisition and analysis of data  
Revising the article  
Approval of the final version to be published

Cumhur Öner:           Design of the study  
Analysis and interpretation of data  
Revising the article  
Approval of the final version to be published

René Castelein:        Design of the study  
Analysis and interpretation of data  
Revising the article  
Approval of the final version to be published

Marinus de Kleuver:   Conception and design of the study  
Analysis and interpretation of data  
Revising the article  
Approval of the final version to be published



## Declarations

The Corresponding Author has the right to grant on behalf of all authors and does grant on behalf of all authors, an exclusive licence (or non exclusive for government employees) on a worldwide basis to the BMJ Publishing Group Ltd to permit this article (if accepted) to be published in BMJ editions and any other BMJ PGL products and sublicences such use and exploit all subsidiary rights, as set out in their licence.

All authors have completed the Unified Competing Interest form at [www.icmje.org/coi\\_disclosure.pdf](http://www.icmje.org/coi_disclosure.pdf) (available on request from the corresponding author) and declare: no support from any organisation for the submitted work; no financial relationships with any organisations that might have an interest in the submitted work in the previous three years; no other relationships or activities that could appear to have influenced the submitted work.

## Funding

This research received no specific grant from any funding agency in the public, commercial or not-for-profit sectors.

## Acknowledgments

The authors would like to thank the members of the Dutch Spine Society for their participation in this study.

## References

1. Walker BF. The prevalence of low back pain: a systematic review of the literature from 1966 to 1998. *J Spinal Disord* 2000;13:205-17.
2. Cherkin DC, Deyo RA, Loeser JD, et al. An international comparison of back surgery rates. *Spine* 1994;19:1201-6.
3. Slobbe LCJ KG, Smit JM, Groen J, et al. Kosten van ziekten in Nederland 2003. RIVM rapport 270751010. Bilthoven: RIVM, 2006.
4. Krismer M. Fusion of the lumbar spine. A consideration of the indications. *J Bone Joint Surg Br* 2002;84:783-94.
5. Turner JA, Ersek M, Herron L, et al. Patient outcomes after lumbar spinal fusions. *Jama* 1992;268:907-11.
6. Gibson JN, Grant IC, Waddell G. The Cochrane review of surgery for lumbar disc prolapse and degenerative lumbar spondylosis. *Spine* 1999;24:1820-32.
7. Gibson JN, Waddell G. Surgery for degenerative lumbar spondylosis: updated Cochrane Review. *Spine* 2005;30:2312-20.
8. Fritzell P, Hagg O, Wessberg P, et al. 2001 Volvo Award Winner in Clinical Studies: Lumbar fusion versus nonsurgical treatment for chronic low back pain: a multicenter randomized controlled trial from the Swedish Lumbar Spine Study Group. *Spine* 2001;26:2521-32; discussion 32-4.
9. Fritzell P, Hagg O, Jonsson D, et al. Cost-effectiveness of lumbar fusion and nonsurgical treatment for chronic low back pain in the Swedish Lumbar Spine Study: a multicenter, randomized, controlled trial from the Swedish Lumbar Spine Study Group. *Spine* 2004;29:421-34; discussion Z3.
10. Brox JI, Sorensen R, Friis A, et al. Randomized clinical trial of lumbar instrumented fusion and cognitive intervention and exercises in patients with chronic low back pain and disc degeneration. *Spine* 2003;28:1913-21.
11. Fairbank J, Frost H, Wilson-MacDonald J, et al. Randomised controlled trial to compare surgical stabilisation of the lumbar spine with an intensive rehabilitation programme for patients with chronic low back pain: the MRC spine stabilisation trial. *Bmj* 2005;330:1233.
12. Wilson-MacDonald J, Fairbank J, Frost H, et al. The MRC spine stabilization trial: surgical methods, outcomes, costs, and complications of surgical stabilization. *Spine* 2008;33:2334-40.
13. Rivero-Arias O, Campbell H, Gray A, et al. Surgical stabilisation of the spine compared with a programme of intensive rehabilitation for the management of patients with chronic low back pain: cost utility analysis based on a randomised controlled trial. *Bmj* 2005;330:1239.
14. DeBerard MS, Masters KS, Colledge AL, et al. Outcomes of posterolateral lumbar fusion in Utah patients receiving workers' compensation: a retrospective cohort study. *Spine* 2001;26:738-46; discussion 47.
15. Deyo RA, Bass JE. Lifestyle and low-back pain. The influence of smoking and obesity. *Spine* 1989;14:501-6.
16. Colhoun E, McCall IW, Williams L, et al. Provocation discography as a guide to planning operations on the spine. *J Bone Joint Surg Br* 1988;70:267-71.
17. Katz JN. Lumbar disc disorders and low-back pain: socioeconomic factors and consequences. *J Bone Joint Surg Am* 2006;88 Suppl 2:21-4.

18. Pincus T, Burton AK, Vogel S, et al. A systematic review of psychological factors as predictors of chronicity/disability in prospective cohorts of low back pain. *Spine* 2002;27:E109-20.
19. Patel N, Bagan B, Vadera S, et al. Obesity and spine surgery: relation to perioperative complications. *J Neurosurg Spine* 2007;6:291-7.
20. Katz JN. Lumbar spinal fusion. Surgical rates, costs, and complications. *Spine* 1995;20:78S-83S.
21. Weinstein JN, Lurie JD, Olson PR, et al. United States' trends and regional variations in lumbar spine surgery: 1992-2003. *Spine* 2006;31:2707-14.
22. Airaksinen O, Brox JI, Cedraschi C, et al. Chapter 4. European guidelines for the management of chronic nonspecific low back pain. *Eur Spine J* 2006;15 Suppl 2:S192-300.
23. Boden SD, McCowin PR, Davis DO, et al. Abnormal magnetic-resonance scans of the cervical spine in asymptomatic subjects. A prospective investigation. *J Bone Joint Surg Am* 1990;72:1178-84.
24. Jarvik JJ, Hollingworth W, Heagerty P, et al. The Longitudinal Assessment of Imaging and Disability of the Back (LAIDBack) Study: baseline data. *Spine* 2001;26:1158-66.
25. van Tulder MW, Assendelft WJ, Koes BW, et al. Spinal radiographic findings and nonspecific low back pain. A systematic review of observational studies. *Spine* 1997;22:427-34.
26. Axelsson P, Johnsson R, Stromqvist B, et al. Orthosis as prognostic instrument in lumbar fusion: no predictive value in 50 cases followed prospectively. *J Spinal Disord* 1995;8:284-8.
27. Willems PC, Elmans L, Anderson PG, et al. The value of a pantaloon cast test in surgical decision making for chronic low back pain patients: a systematic review of the literature supplemented with a prospective cohort study. *Eur Spine J* 2006;15:1487-94.
28. Carragee EJ, Tanner CM, Khurana S, et al. The rates of false-positive lumbar discography in select patients without low back symptoms. *Spine* 2000;25:1373-80; discussion 81.
29. Willems PC, Elmans L, Anderson PG, et al. Provocative discography and lumbar fusion: is preoperative assessment of adjacent discs useful? *Spine (Phila Pa 1976)* 2007;32:1094-9; discussion 100.
30. Bednar DA. Failure of external spinal skeletal fixation to improve predictability of lumbar arthrodesis. *J Bone Joint Surg Am* 2001;83-A:1656-9.
31. Elmans L, Willems PC, Anderson PG, et al. Temporary external transpedicular fixation of the lumbosacral spine: a prospective, longitudinal study in 330 patients. *Spine* 2005;30:2813-6.
32. Esses SI, Moro JK. The value of facet joint blocks in patient selection for lumbar fusion. *Spine* 1993;18:185-90.
33. Hemingway H, Riley RD, Altman DG. Ten steps towards improving prognosis research. *Bmj* 2009;339:b4184.
34. Haefeli M, Elfering A, Aebi M, et al. What comprises a good outcome in spinal surgery? A preliminary survey among spine surgeons of the SSE and European spine patients. *Eur Spine J* 2008;17:104-16.
35. Deyo RA, Nachemson A, Mirza SK. Spinal-fusion surgery - the case for restraint. *N Engl J Med* 2004;350:722-6.
36. Waddell G. Low back pain: a twentieth century health care enigma. *Spine* 1996;21:2820-5.

1  
2  
3  
4  
5  
6  
7  
8  
9  
10  
11  
12  
13  
14  
15  
16  
17  
18  
19  
20  
21  
22  
23  
24  
25  
26  
27  
28  
29  
30  
31  
32  
33  
34  
35  
36  
37  
38  
39  
40  
41  
42  
43  
44  
45  
46  
47  
48  
49  
50  
51  
52  
53  
54  
55  
56  
57  
58  
59  
60

37. Sackett DL, Rosenberg WM, Gray JA, et al. Evidence based medicine: what it is and what it isn't. *Bmj* 1996;312:71-2.

38. Campbell C, Guy A. 'Why can't they do anything for a simple back problem?' A qualitative examination of expectations for low back pain treatment and outcome. *J Health Psychol* 2007;12:641-52.

For peer review only

**Table 3** Characteristics of the 62 respondents

|                                 | <b>Orthopaedic<br/>surgeons (n)</b> | <b>Neurosurgeons<br/>(n)</b> | <b>All respondents<br/>(n)</b> |
|---------------------------------|-------------------------------------|------------------------------|--------------------------------|
| No. of respondents              | 46                                  | 16                           | 62                             |
| Age                             |                                     |                              |                                |
| < 50 years                      | 22                                  | 10                           | 32                             |
| ≥ 50 years                      | 24                                  | 6                            | 30                             |
| Clinical experience             |                                     |                              |                                |
| < 10 years                      | 13                                  | 5                            | 18                             |
| ≥ 10 years                      | 33                                  | 11                           | 44                             |
| Type of hospital                |                                     |                              |                                |
| University/specialized          | 13                                  | 5                            | 18                             |
| General                         | 33                                  | 11                           | 44                             |
| No. of fusions for<br>CLBP/year |                                     |                              |                                |
| 1-10                            | 24                                  | 9                            | 33                             |
| 10-25                           | 9                                   | 6                            | 15                             |
| 25-50                           | 7                                   | 1                            | 8                              |
| ≥ 50                            | 6                                   | 0                            | 6                              |

Abbreviation: CLBP = chronic low back pain; n = number

**Table 4** Respondents' opinion to what extent patient-specific prognostic factors influence their clinical decision making in the treatment of CLBP. The numbers listed are percentages of valid responses

|                                                               |                  |                  |                  |                   |
|---------------------------------------------------------------|------------------|------------------|------------------|-------------------|
| Maximum number of levels for fusion                           | 1 level          | 2 levels         | 3 or more levels | p-value*          |
|                                                               | <b>18 (30.5)</b> | <b>23 (39.0)</b> | <b>18 (30.5)</b> | <b>p&lt;0.001</b> |
| Minimum age patient                                           | Under 20 yrs     | 20 to 30 yrs     | 30 yrs or more   |                   |
|                                                               | <b>15 (24.6)</b> | <b>25 (41.0)</b> | <b>21 (34.4)</b> | <b>p&lt;0.001</b> |
| Maximum age patient                                           | 40 to 50 yrs     | 50 to 60 yrs     | 60 yrs or more   |                   |
|                                                               | <b>5 (8.1)</b>   | <b>12 (19.4)</b> | <b>45 (72.5)</b> | <b>NS</b>         |
| Minimal length conservative therapy                           | Less than 6 mo   | 6 mo to 1 yr     | 1 yr or more     |                   |
|                                                               | <b>3 (4.8)</b>   | <b>36 (58.1)</b> | <b>23 (37.1)</b> | <b>NS</b>         |
| Maximum Body Mass Index (BMI)                                 | Under 31         | 31 to 37         | 37 or more       |                   |
|                                                               | <b>29 (46.8)</b> | <b>18 (29.0)</b> | <b>15 (24.2)</b> | <b>p&lt;0.001</b> |
| Maximum number of cigarettes / day                            | 0                | 1 to 20          | 20 or more       |                   |
|                                                               | <b>29 (47.5)</b> | <b>7 (11.4)</b>  | <b>25 (40.9)</b> | <b>p&lt;0.001</b> |
| Referral overweight patients to dietician                     | Always           | Sometimes        | Never            |                   |
|                                                               | <b>29 (46.8)</b> | <b>20 (32.3)</b> | <b>13 (21.0)</b> | <b>p&lt;0.001</b> |
| Psychological screening referral                              | Always           | Sometimes        | Never            |                   |
|                                                               | <b>10 (16.2)</b> | <b>28 (45.2)</b> | <b>24 (38.7)</b> | <b>p&lt;0.001</b> |
| Different criteria for primary DDD versus prior spine surgery | Agree            | Neutral          | Disagree         |                   |
|                                                               | <b>44 (71.0)</b> | <b>8 (12.9)</b>  | <b>10 (16.1)</b> | <b>NS</b>         |
| Work status affects outcome                                   | Agree            | Neutral          | Disagree         |                   |
|                                                               | <b>29 (46.7)</b> | <b>17 (27.4)</b> | <b>16 (25.9)</b> | <b>p&lt;0.001</b> |

|                                      |                  |                 |                  |           |
|--------------------------------------|------------------|-----------------|------------------|-----------|
| Litigation procedures affect outcome | Agree            | Neutral         | Disagree         |           |
|                                      | <b>43 (69.3)</b> | <b>9 (14.5)</b> | <b>10 (16.2)</b> | <b>NS</b> |

Abbreviation: DDD = degenerative disc disease, NS = not significant.

\*Chi-square test:  $p < 0.05$  means significantly less than 70% consensus, NS implies uniformity.

For peer review only

**Table 5a** Respondents' opinion on predictive tests for clinical decision making. The numbers listed are valid responses and respective percentages

| Predictive test                    | Agree (%) | Neutral (%) | Disagree (%) | p-value* |
|------------------------------------|-----------|-------------|--------------|----------|
| MRI sufficient for decision making | 10 (16.1) | 11 (17.7)   | 41 (66.1)    | NS       |
| Cast immobilization valuable test  | 25 (40.3) | 15 (24.2)   | 22 (35.5)    | <0.001   |
| Cast immobilization too unpleasant | 11 (17.7) | 16 (25.8)   | 35 (56.5)    | 0.028    |
| PD proven valuable test            | 23 (37.7) | 16 (26.2)   | 22 (36.0)    | <0.001   |
| PD too many complications          | 3 (4.9)   | 14 (23.0)   | 44 (72.1)    | NS       |
| TETF valuable test                 | 8 (13.4)  | 33 (55.0)   | 19 (31.6)    | 0.011    |
| TETF too many complications        | 20 (32.7) | 31 (50.8)   | 10 (16.4)    | 0.001    |

Abbreviations: MRI = magnetic resonance imaging, PD = provocative discography, TETF = temporary external transpedicular fixation, NS = not significant.

\*Chi-square test:  $p < 0.05$  means significantly less than 70% consensus, NS implies uniformity.



**Table 5b** The use of predictive tests by the surgeons in clinical practice. The numbers listed are valid responses and their respective percentages

| Use of test         | Always (%) | Sometimes (%) | Never (%) | p-value* |
|---------------------|------------|---------------|-----------|----------|
| Facet joint blocks  | 5 (8.1)    | 32 (51.6)     | 25 (40.3) | 0.002    |
| Cast immobilization | 20 (32.8)  | 23 (37.7)     | 18 (29.6) | <0.001   |
| PD                  | 25 (42.4)  | 10 (16.9)     | 24 (40.7) | <0.001   |
| TETF                | 0 (0.0)    | 3 (4.9)       | 58 (95.1) | NS       |

Abbreviations : PD = provocative discography, TETF = temporary external transpedicular fixation, NS = not significant.

\*Chi-square test:  $p < 0.05$  means significantly less than 70% consensus, NS implies uniformity.

## Appendix

### Questionnaire on decision making for lumbar spinal fusion in chronic low back pain patients

- |                                                                                                                                                                                                                                                                                                                                                                                                                                                      |                                                                             |   |                              |
|------------------------------------------------------------------------------------------------------------------------------------------------------------------------------------------------------------------------------------------------------------------------------------------------------------------------------------------------------------------------------------------------------------------------------------------------------|-----------------------------------------------------------------------------|---|------------------------------|
| 1                                                                                                                                                                                                                                                                                                                                                                                                                                                    | What is your discipline?                                                    | 1 | Neurosurgery                 |
|                                                                                                                                                                                                                                                                                                                                                                                                                                                      |                                                                             | 2 | Orthopaedic surgery          |
|                                                                                                                                                                                                                                                                                                                                                                                                                                                      |                                                                             | 3 | Other,                       |
|                                                                                                                                                                                                                                                                                                                                                                                                                                                      |                                                                             |   | .....                        |
| 2                                                                                                                                                                                                                                                                                                                                                                                                                                                    | What is your age?                                                           | 1 | Under 30 years               |
|                                                                                                                                                                                                                                                                                                                                                                                                                                                      |                                                                             | 2 | 30 to 40 years               |
|                                                                                                                                                                                                                                                                                                                                                                                                                                                      |                                                                             | 3 | 40 to 50 years               |
|                                                                                                                                                                                                                                                                                                                                                                                                                                                      |                                                                             | 4 | 50 to 60 years               |
|                                                                                                                                                                                                                                                                                                                                                                                                                                                      |                                                                             | 5 | 60 years or older            |
| 3                                                                                                                                                                                                                                                                                                                                                                                                                                                    | Since when do you perform spinal surgery?                                   | 1 | Less than 1 year             |
|                                                                                                                                                                                                                                                                                                                                                                                                                                                      |                                                                             | 2 | 1 to 5 years                 |
|                                                                                                                                                                                                                                                                                                                                                                                                                                                      |                                                                             | 3 | 5 to 10 years                |
|                                                                                                                                                                                                                                                                                                                                                                                                                                                      |                                                                             | 4 | 10 to 15 years               |
|                                                                                                                                                                                                                                                                                                                                                                                                                                                      |                                                                             | 5 | 15 years or more             |
| 4                                                                                                                                                                                                                                                                                                                                                                                                                                                    | In what kind of hospital do you work?<br>(more than one answer possible)    | 1 | University hospital          |
|                                                                                                                                                                                                                                                                                                                                                                                                                                                      |                                                                             | 2 | General teaching hospital    |
|                                                                                                                                                                                                                                                                                                                                                                                                                                                      |                                                                             | 3 | General nonteaching hospital |
|                                                                                                                                                                                                                                                                                                                                                                                                                                                      |                                                                             | 4 | Specialized hospital         |
|                                                                                                                                                                                                                                                                                                                                                                                                                                                      |                                                                             | 5 | Other,                       |
|                                                                                                                                                                                                                                                                                                                                                                                                                                                      |                                                                             |   | .....                        |
| <p><b>The next questions concern the indication for lumbar spinal fusion (or lumbar total disc replacement if appropriate) in patients with low back pain caused by degenerative lumbar disc disease without signs of neurological deficit, spinal stenosis, deformity or spondylolisthesis and in the absence of trauma, tumor, infections or other consuming illnesses, further to be referred to as chronic low back pain (CLBP) patients</b></p> |                                                                             |   |                              |
| 5                                                                                                                                                                                                                                                                                                                                                                                                                                                    | How many lumbar fusions do you perform each year in CLBP patients?          | 1 | 0                            |
|                                                                                                                                                                                                                                                                                                                                                                                                                                                      |                                                                             | 2 | 1 to 10                      |
|                                                                                                                                                                                                                                                                                                                                                                                                                                                      |                                                                             | 3 | 10 to 25                     |
|                                                                                                                                                                                                                                                                                                                                                                                                                                                      |                                                                             | 4 | 25 to 50                     |
|                                                                                                                                                                                                                                                                                                                                                                                                                                                      |                                                                             | 5 | 50 or more                   |
| 6                                                                                                                                                                                                                                                                                                                                                                                                                                                    | How many total disc replacements do you perform each year in CLBP patients? | 1 | 0                            |
|                                                                                                                                                                                                                                                                                                                                                                                                                                                      |                                                                             | 2 | 1 to 10                      |
|                                                                                                                                                                                                                                                                                                                                                                                                                                                      |                                                                             | 3 | 10 to 25                     |
|                                                                                                                                                                                                                                                                                                                                                                                                                                                      |                                                                             | 4 | 25 to 50                     |
|                                                                                                                                                                                                                                                                                                                                                                                                                                                      |                                                                             | 5 | 50 or more                   |
| 7                                                                                                                                                                                                                                                                                                                                                                                                                                                    | What is for you the maximum number of levels to be fused in CLBP patients?  | 1 | 1                            |
|                                                                                                                                                                                                                                                                                                                                                                                                                                                      |                                                                             | 2 | 2                            |
|                                                                                                                                                                                                                                                                                                                                                                                                                                                      |                                                                             | 3 | 3                            |
|                                                                                                                                                                                                                                                                                                                                                                                                                                                      |                                                                             | 4 | 4 or more                    |

- 1  
2  
3  
4  
5  
6  
7  
8  
9  
10  
11  
12  
13  
14  
15  
16  
17  
18  
19  
20  
21  
22  
23  
24  
25  
26  
27  
28  
29  
30  
31  
32  
33  
34  
35  
36  
37  
38  
39  
40  
41  
42  
43  
44  
45  
46  
47  
48  
49  
50  
51  
52  
53  
54  
55  
56  
57  
58  
59  
60
- |     |                                                                                                                                  |          |                               |
|-----|----------------------------------------------------------------------------------------------------------------------------------|----------|-------------------------------|
|     |                                                                                                                                  | <b>5</b> | No maximum                    |
| 8a  | What is for you the absolute minimum age of a CLBP patient to be considered for lumbar fusion?                                   | <b>1</b> | Under 20 years                |
|     |                                                                                                                                  | <b>2</b> | 20 to 30 years                |
|     |                                                                                                                                  | <b>3</b> | 30 to 40 years                |
|     |                                                                                                                                  | <b>4</b> | 40 years or more              |
|     |                                                                                                                                  | <b>5</b> | No minimum age                |
| 8b  | What would be for you the absolute maximum age of a CLBP patient to be considered for lumbar fusion?                             | <b>1</b> | Under 40 years                |
|     |                                                                                                                                  | <b>2</b> | 40 to 50 years                |
|     |                                                                                                                                  | <b>3</b> | 50 to 60 years                |
|     |                                                                                                                                  | <b>4</b> | 60 years or older             |
|     |                                                                                                                                  | <b>5</b> | No maximum age                |
| 9   | How long should a CLBP patient at least have followed conservative therapy in order to be considered for lumbar fusion?          | <b>1</b> | 0 to 6 months                 |
|     |                                                                                                                                  | <b>2</b> | 6 months to 1 year            |
|     |                                                                                                                                  | <b>3</b> | 1 to 2 years                  |
|     |                                                                                                                                  | <b>4</b> | 2 years or longer             |
|     |                                                                                                                                  | <b>5</b> | No minimum                    |
| 10a | What would be for you the maximum weight of a 1.80 meter long male CLBP patient in order to be considered for lumbar fusion?     | <b>1</b> | Less than 80 kg               |
|     |                                                                                                                                  | <b>2</b> | 80 to 100 kg                  |
|     |                                                                                                                                  | <b>3</b> | 100 to 120 kg                 |
|     |                                                                                                                                  | <b>4</b> | 120 kg or more                |
|     |                                                                                                                                  | <b>5</b> | No maximum weight             |
| 10b | Do you send overweight CLBP patients to a dietician before considering lumbar fusion?                                            | <b>1</b> | Always                        |
|     |                                                                                                                                  | <b>2</b> | Frequently                    |
|     |                                                                                                                                  | <b>3</b> | Sometimes                     |
|     |                                                                                                                                  | <b>4</b> | Seldom                        |
|     |                                                                                                                                  | <b>5</b> | Never                         |
| 11  | What is for you the maximum number of cigarettes a CLBP patient is allowed to smoke in order to be considered for lumbar fusion? | <b>1</b> | 0 cigarettes per day          |
|     |                                                                                                                                  | <b>2</b> | 1 to 10 cigarettes per day    |
|     |                                                                                                                                  | <b>3</b> | 10 to 20 cigarettes per day   |
|     |                                                                                                                                  | <b>4</b> | 20 or more cigarettes per day |
|     |                                                                                                                                  | <b>5</b> | No maximum                    |
| 12  | Do you send CLBP patients for psychological screening before considering lumbar fusion?                                          | <b>1</b> | Always                        |
|     |                                                                                                                                  | <b>2</b> | Frequently                    |
|     |                                                                                                                                  | <b>3</b> | Sometimes                     |
|     |                                                                                                                                  | <b>4</b> | Seldom                        |
|     |                                                                                                                                  | <b>5</b> | Never                         |

You are requested to indicate whether you agree or not with the following statements.

|    |                                                                                                                                                                          | Fully agree | Partially agree | Neutral | Partially disagree | Fully disagree |
|----|--------------------------------------------------------------------------------------------------------------------------------------------------------------------------|-------------|-----------------|---------|--------------------|----------------|
| 13 | The preoperative selection criteria for CLBP patients who had spine surgery before are substantially different from those for CLBP patients without prior spine surgery. | 1           | 2               | 3       | 4                  | 5              |
| 14 | The work status (Full or partial disability, long term sick leave) of a CLBP patient is of great influence on your decision to perform lumbar fusion.                    | 1           | 2               | 3       | 4                  | 5              |
| 15 | Involvement in litigation or workers compensation processes is of great influence on your decision making.                                                               | 1           | 2               | 3       | 4                  | 5              |
| 16 | Plain radiographs and MRI-findings in CLBP patients are sufficient for your decision to perform lumbar fusion.                                                           | 1           | 2               | 3       | 4                  | 5              |

The next statements and questions concern clinical tests that may be helpful in decision making for lumbar fusion in CLBP patients.

|     |                                                                                                                            |             |                 |           |                    |                |
|-----|----------------------------------------------------------------------------------------------------------------------------|-------------|-----------------|-----------|--------------------|----------------|
| 17a | Trial immobilization in a plaster jacket or pantaloon cast is a proven valuable test for decision making in CLBP patients. | 1           | 2               | 3         | 4                  | 5              |
|     |                                                                                                                            | Always      | Frequently      | Sometimes | Seldom             | Never          |
| 17b | Do you use this trial immobilization in a cast in CLBP patients?                                                           | 1           | 2               | 3         | 4                  | 5              |
|     |                                                                                                                            | Fully agree | Partially agree | Neutral   | Partially disagree | Fully disagree |
| 17c | Trial immobilization in a cast is too unpleasant for the patient to be executed.                                           | 1           | 2               | 3         | 4                  | 5              |

|    |     |                                                                                                                                      |                 |           |                    |                |
|----|-----|--------------------------------------------------------------------------------------------------------------------------------------|-----------------|-----------|--------------------|----------------|
| 1  |     |                                                                                                                                      |                 |           |                    |                |
| 2  |     |                                                                                                                                      |                 |           |                    |                |
| 3  |     |                                                                                                                                      |                 |           |                    |                |
| 4  |     | Fully agree                                                                                                                          | Partially agree | Neutral   | Partially disagree | Fully disagree |
| 5  |     | <b>1</b>                                                                                                                             | <b>2</b>        | <b>3</b>  | <b>4</b>           | <b>5</b>       |
| 6  | 18a | Provocative discography is a proven valuable test for decision making in CLBP patients.                                              |                 |           |                    |                |
| 7  |     |                                                                                                                                      |                 |           |                    |                |
| 8  |     |                                                                                                                                      |                 |           |                    |                |
| 9  |     |                                                                                                                                      |                 |           |                    |                |
| 10 |     | Always                                                                                                                               | Frequently      | Sometimes | seldom             | Never          |
| 11 |     | <b>1</b>                                                                                                                             | <b>2</b>        | <b>3</b>  | <b>4</b>           | <b>5</b>       |
| 12 | 18b | Are CLBP patients in your practice selected for fusion by provocative discography?                                                   |                 |           |                    |                |
| 13 |     |                                                                                                                                      |                 |           |                    |                |
| 14 |     |                                                                                                                                      |                 |           |                    |                |
| 15 |     | Fully agree                                                                                                                          | Partially agree | Neutral   | Partially disagree | Fully disagree |
| 16 |     | <b>1</b>                                                                                                                             | <b>2</b>        | <b>3</b>  | <b>4</b>           | <b>5</b>       |
| 17 | 18c | Provocative discography has too many complications to be executed.                                                                   |                 |           |                    |                |
| 18 |     |                                                                                                                                      |                 |           |                    |                |
| 19 |     |                                                                                                                                      |                 |           |                    |                |
| 20 |     | Fully agree                                                                                                                          | Partially agree | Neutral   | Partially disagree | Fully disagree |
| 21 |     | <b>1</b>                                                                                                                             | <b>2</b>        | <b>3</b>  | <b>4</b>           | <b>5</b>       |
| 22 | 19a | Temporary external transpedicular fixation (TETF) of one or more segments is a proven valuable for decision making in CLBP patients. |                 |           |                    |                |
| 23 |     |                                                                                                                                      |                 |           |                    |                |
| 24 |     |                                                                                                                                      |                 |           |                    |                |
| 25 |     | Always                                                                                                                               | Frequently      | Sometimes | Seldom             | Never          |
| 26 |     | <b>1</b>                                                                                                                             | <b>2</b>        | <b>3</b>  | <b>4</b>           | <b>5</b>       |
| 27 | 19b | Do you use TETF as a tool for decision making in CLBP patients?                                                                      |                 |           |                    |                |
| 28 |     |                                                                                                                                      |                 |           |                    |                |
| 29 |     |                                                                                                                                      |                 |           |                    |                |
| 30 |     | Fully agree                                                                                                                          | Partially agree | Neutral   | Partially disagree | Fully disagree |
| 31 |     | <b>1</b>                                                                                                                             | <b>2</b>        | <b>3</b>  | <b>4</b>           | <b>5</b>       |
| 32 | 19c | TETF has too many complications to be executed in CLBP patients.                                                                     |                 |           |                    |                |
| 33 |     |                                                                                                                                      |                 |           |                    |                |
| 34 |     |                                                                                                                                      |                 |           |                    |                |
| 35 |     | Always                                                                                                                               | Frequently      | Sometimes | Seldom             | Never          |
| 36 |     | <b>1</b>                                                                                                                             | <b>2</b>        | <b>3</b>  | <b>4</b>           | <b>5</b>       |
| 37 | 20  | Are CLBP patients in your practice selected for fusion by facet joint blocks?                                                        |                 |           |                    |                |
| 38 |     |                                                                                                                                      |                 |           |                    |                |
| 39 |     |                                                                                                                                      |                 |           |                    |                |
| 40 |     | Always                                                                                                                               | Frequently      | Sometimes | Seldom             | Never          |
| 41 |     | <b>1</b>                                                                                                                             | <b>2</b>        | <b>3</b>  | <b>4</b>           | <b>5</b>       |
| 42 |     |                                                                                                                                      |                 |           |                    |                |
| 43 |     |                                                                                                                                      |                 |           |                    |                |
| 44 |     |                                                                                                                                      |                 |           |                    |                |
| 45 |     |                                                                                                                                      |                 |           |                    |                |
| 46 |     |                                                                                                                                      |                 |           |                    |                |
| 47 |     |                                                                                                                                      |                 |           |                    |                |
| 48 |     |                                                                                                                                      |                 |           |                    |                |
| 49 |     |                                                                                                                                      |                 |           |                    |                |
| 50 |     |                                                                                                                                      |                 |           |                    |                |
| 51 |     |                                                                                                                                      |                 |           |                    |                |
| 52 |     |                                                                                                                                      |                 |           |                    |                |
| 53 |     |                                                                                                                                      |                 |           |                    |                |
| 54 |     |                                                                                                                                      |                 |           |                    |                |
| 55 |     |                                                                                                                                      |                 |           |                    |                |
| 56 |     |                                                                                                                                      |                 |           |                    |                |
| 57 |     |                                                                                                                                      |                 |           |                    |                |
| 58 |     |                                                                                                                                      |                 |           |                    |                |
| 59 |     |                                                                                                                                      |                 |           |                    |                |
| 60 |     |                                                                                                                                      |                 |           |                    |                |



1  
2  
3  
4  
5  
6  
7  
8  
9  
10  
11  
12  
13  
14  
15  
16  
17  
18  
19  
20  
21  
22  
23  
24  
25  
26  
27  
28  
29  
30  
31  
32  
33  
34  
35  
36  
37  
38  
39  
40  
41  
42  
43  
44  
45  
46  
47  
48  
49  
50  
51  
52  
53  
54  
55  
56  
57  
58  
59  
60

|     |                                                                                                                | Very satisfied | Fairly satisfied                       | Neutral   | Fairly unsatisfied | Very unsatisfied |
|-----|----------------------------------------------------------------------------------------------------------------|----------------|----------------------------------------|-----------|--------------------|------------------|
| 24  | Are you satisfied with the results of the management of CLBP patients in your practice?                        | <b>1</b>       | <b>2</b>                               | <b>3</b>  | <b>4</b>           | <b>5</b>         |
| 25a | Are there protocols or guidelines in your clinic as to what CLBP patients can be considered for lumbar fusion? | <b>1</b>       | Yes, please continue with question 25b |           |                    |                  |
|     |                                                                                                                | <b>2</b>       | No, please continue with question 25c  |           |                    |                  |
|     |                                                                                                                | Always         | Frequently                             | Sometimes | Seldom             | Never            |
| 25b | If yes, do you adhere to these guidelines for every CLBP patient in your practice?                             | <b>1</b>       | <b>2</b>                               | <b>3</b>  | <b>4</b>           | <b>5</b>         |
|     |                                                                                                                | Fully agree    | Partially agree                        | Neutral   | Partially disagree | Fully disagree   |
| 25c | If no, do you think there should be guidelines for the management of CLBP patients?                            | <b>1</b>       | <b>2</b>                               | <b>3</b>  | <b>4</b>           | <b>5</b>         |

**Research Checklist:** + = completed, NA = not applicable

Spinal fusion for chronic low back pain: No consensus in clinical decision making.

Results of a nationwide survey among spine surgeons

The STROBE statement for cross-sectional studies was used as this was considered to be the most appropriate checklist for the present survey among spine surgeons.

STROBE Statement—Checklist of items that should be included in reports of *cross-sectional studies*

|                                | Item No | Recommendation                                                                                                                                                                                    |
|--------------------------------|---------|---------------------------------------------------------------------------------------------------------------------------------------------------------------------------------------------------|
| <b>Title and abstract</b>      | 1       | (a) Indicate the study's design with a commonly used term in the title or the abstract                                                                                                            |
| +                              |         | (b) Provide in the abstract an informative and balanced summary of what was done and what was found                                                                                               |
| <b>Introduction</b>            |         |                                                                                                                                                                                                   |
| + Background/rationale         | 2       | Explain the scientific background and rationale for the investigation being reported                                                                                                              |
| + Objectives                   | 3       | State specific objectives, including any prespecified hypotheses                                                                                                                                  |
| <b>Methods</b>                 |         |                                                                                                                                                                                                   |
| + Study design                 | 4       | Present key elements of study design early in the paper                                                                                                                                           |
| + Setting                      | 5       | Describe the setting, locations, and relevant dates, including periods of recruitment, exposure, follow-up, and data collection                                                                   |
| + Participants                 | 6       | (a) Give the eligibility criteria, and the sources and methods of selection of participants                                                                                                       |
| + Variables                    | 7       | Clearly define all outcomes, exposures, predictors, potential confounders, and effect modifiers. Give diagnostic criteria, if applicable                                                          |
| + Data sources/<br>measurement | 8*      | For each variable of interest, give sources of data and details of methods of assessment (measurement). Describe comparability of assessment methods if there is more than one group              |
| + Bias                         | 9       | Describe any efforts to address potential sources of bias                                                                                                                                         |
| + Study size                   | 10      | Explain how the study size was arrived at                                                                                                                                                         |
| + Quantitative variables       | 11      | Explain how quantitative variables were handled in the analyses. If applicable, describe which groupings were chosen and why                                                                      |
| + Statistical methods          | 12      | (a) Describe all statistical methods, including those used to control for confounding                                                                                                             |
|                                |         | (b) Describe any methods used to examine subgroups and interactions                                                                                                                               |
|                                |         | (c) Explain how missing data were addressed                                                                                                                                                       |
|                                |         | (d) If applicable, describe analytical methods taking account of sampling strategy                                                                                                                |
|                                |         | (e) Describe any sensitivity analyses                                                                                                                                                             |
| <b>Results</b>                 |         |                                                                                                                                                                                                   |
| + Participants                 | 13*     | (a) Report numbers of individuals at each stage of study—eg numbers potentially eligible, examined for eligibility, confirmed eligible, included in the study, completing follow-up, and analysed |
|                                |         | (b) Give reasons for non-participation at each stage                                                                                                                                              |
|                                |         | (c) Consider use of a flow diagram                                                                                                                                                                |
| + Descriptive data             | 14*     | (a) Give characteristics of study participants (eg demographic, clinical, social) and information on exposures and potential confounders                                                          |



|                          |     |                                                                                                                                                                                                              |
|--------------------------|-----|--------------------------------------------------------------------------------------------------------------------------------------------------------------------------------------------------------------|
|                          |     | (b) Indicate number of participants with missing data for each variable of interest                                                                                                                          |
| + Outcome data           | 15* | Report numbers of outcome events or summary measures                                                                                                                                                         |
| NA Main results          | 16  | (a) Give unadjusted estimates and, if applicable, confounder-adjusted estimates and their precision (eg, 95% confidence interval). Make clear which confounders were adjusted for and why they were included |
|                          |     | (b) Report category boundaries when continuous variables were categorized                                                                                                                                    |
|                          |     | (c) If relevant, consider translating estimates of relative risk into absolute risk for a meaningful time period                                                                                             |
| + Other analyses         | 17  | Report other analyses done—eg analyses of subgroups and interactions, and sensitivity analyses                                                                                                               |
| <b>Discussion</b>        |     |                                                                                                                                                                                                              |
| + Key results            | 18  | Summarise key results with reference to study objectives                                                                                                                                                     |
| + Limitations            | 19  | Discuss limitations of the study, taking into account sources of potential bias or imprecision. Discuss both direction and magnitude of any potential bias                                                   |
| + Interpretation         | 20  | Give a cautious overall interpretation of results considering objectives, limitations, multiplicity of analyses, results from similar studies, and other relevant evidence                                   |
| + Generalisability       | 21  | Discuss the generalisability (external validity) of the study results                                                                                                                                        |
| <b>Other information</b> |     |                                                                                                                                                                                                              |
| NA Funding               | 22  | Give the source of funding and the role of the funders for the present study and, if applicable, for the original study on which the present article is based                                                |

\*Give information separately for exposed and unexposed groups.

**Note:** An Explanation and Elaboration article discusses each checklist item and gives methodological background and published examples of transparent reporting. The STROBE checklist is best used in conjunction with this article (freely available on the Web sites of PLoS Medicine at <http://www.plosmedicine.org/>, Annals of Internal Medicine at <http://www.annals.org/>, and Epidemiology at <http://www.epidem.com/>). Information on the STROBE Initiative is available at [www.strobe-statement.org](http://www.strobe-statement.org).

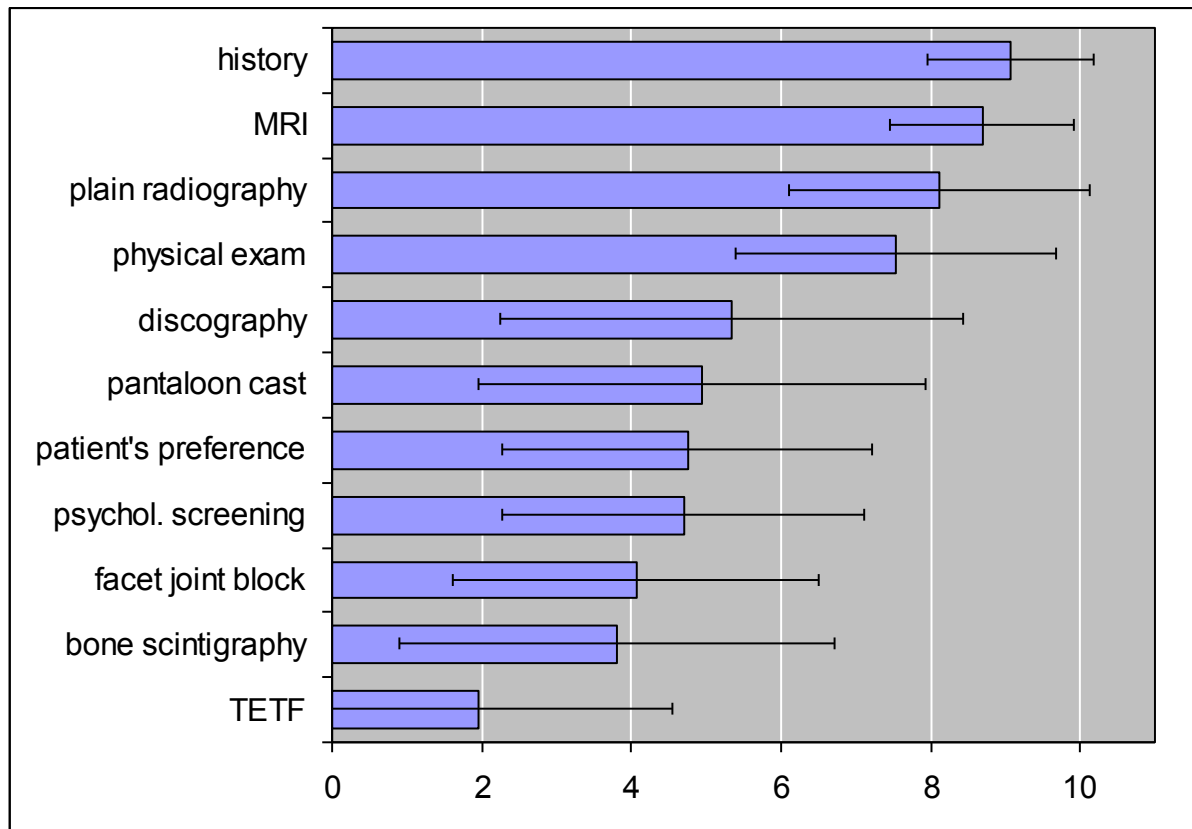

**Figure 1** The importance of listed factors in clinical decision making (presented as mean  $\pm$  sd) as rated by the respondents on a scale from 0 (no importance) to 10 (maximal importance). Abbreviations: MRI = magnetic resonance imaging, TETF = temporary external transpedicular fixation

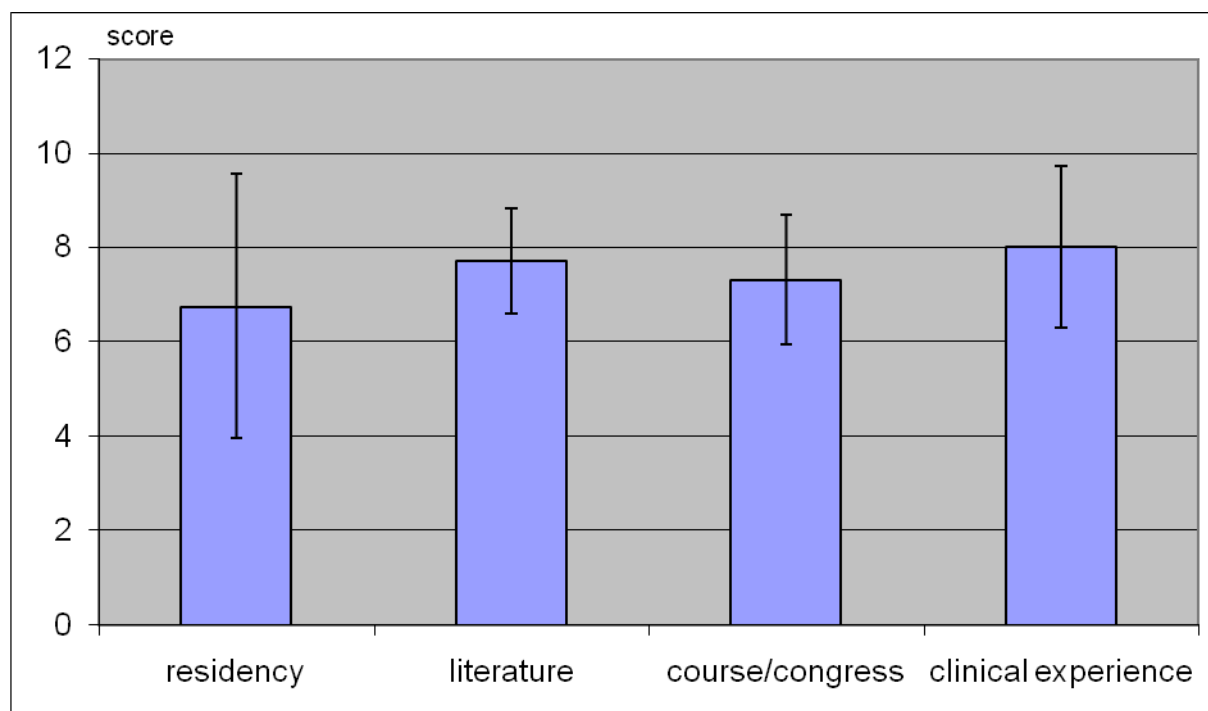

**Figure 2** Factors that influence clinical decision making for chronic low back pain (presented as mean  $\pm$  sd), as rated by respondents on a scale from 0 (no influence) to 10 (maximal influence)
